# Supplementary material
Source: PubMed Central journal article supplement (PMC8719021)
Supplement: mmc1.pdf [file mmc1.pdf]

# Quality of facility-based health care around the time of childbirth during the COVID-19 pandemic: online survey investigating the maternal perspective in 12 countries of the WHO European Region

## Supplementary Material

### Contents

|                                                                                                                                                                    |    |
|--------------------------------------------------------------------------------------------------------------------------------------------------------------------|----|
| Supplementary Table 1 Checklist of items that should be included in reports of cross-sectional studies                                                             | 2  |
| Supplementary Table 2 Data collection period by language                                                                                                           | 4  |
| Supplementary Figure 1 Questionnaire development and validation                                                                                                    | 5  |
| Supplementary Table 3 Quality of maternal and neonatal care index score system                                                                                     | 9  |
| Supplementary Table 4 Proportion of participants compared to expected number of births within the study period based on 2019 data by country                       | 10 |
| Supplementary Table 5 Comparison of the characteristics of responders between women who underwent labour and women with prelabour caesarean section                | 11 |
| Supplementary Table 6 Results on provision of care                                                                                                                 | 13 |
| Supplementary Table 7 Results on experience of care                                                                                                                | 16 |
| Supplementary Table 8 Results on availability of physical and human resources                                                                                      | 18 |
| Supplementary Table 9 Results on reorganizational changes due to COVID-19                                                                                          | 20 |
| Supplementary Table 10 Comparison of the 40 key quality measures between women who underwent labour (N=18063) and women who did not (N=2964)                       | 22 |
| Supplementary Table 11 QMNC Index by country                                                                                                                       | 24 |
| Supplementary Figure 2 QMNC Index by country                                                                                                                       | 25 |
| Supplementary Figure 3 Sensitivity analysis #1: flow diagram (N=15399)                                                                                             | 26 |
| Supplementary Table 12 Sensitivity analysis #1: characteristics of responders (N=15399)                                                                            | 27 |
| Supplementary Table 13 Sensitivity analysis #1: results of the 40 key quality measures between women who underwent labour (N=1366) and women who did not (N=1733)  | 29 |
| Supplementary Figure 4. Sensitivity analysis #2: flow diagram (N=22130)                                                                                            | 31 |
| Supplementary Table 14 Sensitivity analysis #2: characteristics of responders (N=22130)                                                                            | 32 |
| Supplementary Table 15 Sensitivity analysis #2: results of the 40 key quality measures between women who underwent labour (N=18933) and women who did not (N=3197) | 34 |
| Supplementary Table 16 Multivariable quantile regression estimates (n=14954)                                                                                       | 36 |

**Supplementary Table 1 Checklist of items that should be included in reports of cross-sectional studies**

|                              | <b>Item No</b> | <b>Recommendation</b>                                                                                                                                                                                                                                                                                                                      | <b>Pages</b> |
|------------------------------|----------------|--------------------------------------------------------------------------------------------------------------------------------------------------------------------------------------------------------------------------------------------------------------------------------------------------------------------------------------------|--------------|
| <b>Title and abstract</b>    | 1              | (a) Indicate the study's design with a commonly used term in the title or the abstract<br>(b) Provide in the abstract an informative and balanced summary of what was done and what was found                                                                                                                                              | 1,3<br>3     |
| <b>Introduction</b>          |                |                                                                                                                                                                                                                                                                                                                                            |              |
| Background/rationale         | 2              | Explain the scientific background and rationale for the investigation being reported                                                                                                                                                                                                                                                       | 4            |
| Objectives                   | 3              | State specific objectives, including any prespecified hypotheses                                                                                                                                                                                                                                                                           | 4            |
| <b>Methods</b>               |                |                                                                                                                                                                                                                                                                                                                                            |              |
| Study design                 | 4              | Present key elements of study design early in the paper                                                                                                                                                                                                                                                                                    | 5            |
| Setting                      | 5              | Describe the setting, locations, and relevant dates, including periods of recruitment, exposure, follow-up, and data collection                                                                                                                                                                                                            | 5            |
| Participants                 | 6              | (a) Give the eligibility criteria, and the sources and methods of selection of participants                                                                                                                                                                                                                                                | 5            |
| Variables                    | 7              | Clearly define all outcomes, exposures, predictors, potential confounders, and effect modifiers. Give diagnostic criteria, if applicable                                                                                                                                                                                                   | 5-6          |
| Data sources/<br>measurement | 8*             | For each variable of interest, give sources of data and details of methods of assessment (measurement). Describe comparability of assessment methods if there is more than one group                                                                                                                                                       | 5-6          |
| Bias                         | 9              | Describe any efforts to address potential sources of bias                                                                                                                                                                                                                                                                                  | 6-7          |
| Study size                   | 10             | Explain how the study size was arrived at                                                                                                                                                                                                                                                                                                  |              |
| Quantitative variables       | 11             | Explain how quantitative variables were handled in the analyses. If applicable, describe which groupings were chosen and why                                                                                                                                                                                                               | 6-7          |
| Statistical methods          | 12             | (a) Describe all statistical methods, including those used to control for confounding<br>(b) Describe any methods used to examine subgroups and interactions<br>(c) Explain how missing data were addressed<br>(d) If applicable, describe analytical methods taking account of sampling strategy<br>(e) Describe any sensitivity analyses | 6-7          |
| <b>Results</b>               |                |                                                                                                                                                                                                                                                                                                                                            |              |
| Participants                 | 13*            | (a) Report numbers of individuals at each stage of study—eg numbers potentially eligible, examined for eligibility, confirmed eligible, included in the study, completing follow-up, and analysed<br>(b) Give reasons for non-participation at each stage<br>(c) Consider use of a flow diagram                                            | 8-19         |
| Descriptive data             | 14*            | (a) Give characteristics of study participants (eg demographic, clinical, social) and information on exposures and potential confounders<br>(b) Indicate number of participants with missing data for each variable of interest                                                                                                            | 8-19         |
| Outcome data                 | 15*            | Report numbers of outcome events or summary measures                                                                                                                                                                                                                                                                                       | 8-19         |
| Main results                 | 16             | (a) Give unadjusted estimates and, if applicable, confounder-adjusted estimates and their precision (eg, 95% confidence interval). Make clear which confounders were adjusted for and why they were                                                                                                                                        | 8-19         |

|                          |    |                                                                                                                                                                            |       |
|--------------------------|----|----------------------------------------------------------------------------------------------------------------------------------------------------------------------------|-------|
|                          |    | included                                                                                                                                                                   |       |
|                          |    | (b) Report category boundaries when continuous variables were categorized                                                                                                  |       |
|                          |    | (c) If relevant, consider translating estimates of relative risk into absolute risk for a meaningful time period                                                           |       |
| Other analyses           | 17 | Report other analyses done—eg analyses of subgroups and interactions, and sensitivity analyses                                                                             | 17    |
| <b>Discussion</b>        |    |                                                                                                                                                                            |       |
| Key results              | 18 | Summarise key results with reference to study objectives                                                                                                                   | 19    |
| Limitations              | 19 | Discuss limitations of the study, taking into account sources of potential bias or imprecision. Discuss both direction and magnitude of any potential bias                 | 19-20 |
| Interpretation           | 20 | Give a cautious overall interpretation of results considering objectives, limitations, multiplicity of analyses, results from similar studies, and other relevant evidence | 20    |
| Generalisability         | 21 | Discuss the generalisability (external validity) of the study results                                                                                                      | 20    |
| <b>Other information</b> |    |                                                                                                                                                                            |       |
| Funding                  | 22 | Give the source of funding and the role of the funders for the present study and, if applicable, for the original study on which the present article is based              | 23    |

---

Notes: \* Give information separately for exposed and unexposed groups.

## Supplementary Table 2 Data collection period by language

|                                                                                                                   | Languages* | Date of online availability | Country team responsible |
|-------------------------------------------------------------------------------------------------------------------|------------|-----------------------------|--------------------------|
| <b>Dissemination under direct responsibility of a specific country team</b>                                       |            |                             |                          |
|                                                                                                                   | Romanian   | 02/09/2020                  | Romania                  |
|                                                                                                                   | Slovenian  | 20/10/2020                  | Slovenia                 |
|                                                                                                                   | Portuguese | 13/11/2020                  | Portugal                 |
|                                                                                                                   | Serbian    | 17/11/2020                  | Serbia                   |
|                                                                                                                   | Italian    | 18/11/2020                  | Italy                    |
|                                                                                                                   | Swedish    | 26/11/2020                  | Sweden                   |
|                                                                                                                   | German     | 02/12/2020                  | Germany and Luxembourg   |
|                                                                                                                   | Croatian   | 03/12/2020                  | Croatia                  |
|                                                                                                                   | Spanish    | 07/12/2020                  | Spain                    |
|                                                                                                                   | Catalan    | 07/12/2020                  | Spain                    |
|                                                                                                                   | French     | 07/12/2020                  | France** and Luxembourg  |
|                                                                                                                   | Norwegian  | 10/02/2021                  | Norway                   |
| <b>Dissemination not under direct responsibility of a specific country team for this round of data collection</b> |            |                             |                          |
|                                                                                                                   | English    | 02/09/2020                  | NA                       |
|                                                                                                                   | Bosnian    | 18/09/2020                  |                          |
|                                                                                                                   | Albanian   | 06/11/2020                  |                          |
|                                                                                                                   | Russian    | 09/11/2020                  |                          |
|                                                                                                                   | Bengali    | 20/01/2021                  |                          |
|                                                                                                                   | Arabic     | 20/01/2021                  |                          |
|                                                                                                                   | Hindi      | 20/01/2021                  |                          |
|                                                                                                                   | Nepalese   | 20/01/2021                  |                          |
|                                                                                                                   | Chinese    | 20/01/2021                  |                          |

Notes: \*All links always available to all countries after start date; \*\* Roll up in France on 13/01/2021.  
Abbreviation: NA = not applicable.

## Supplementary Figure 1 Questionnaire development and validation

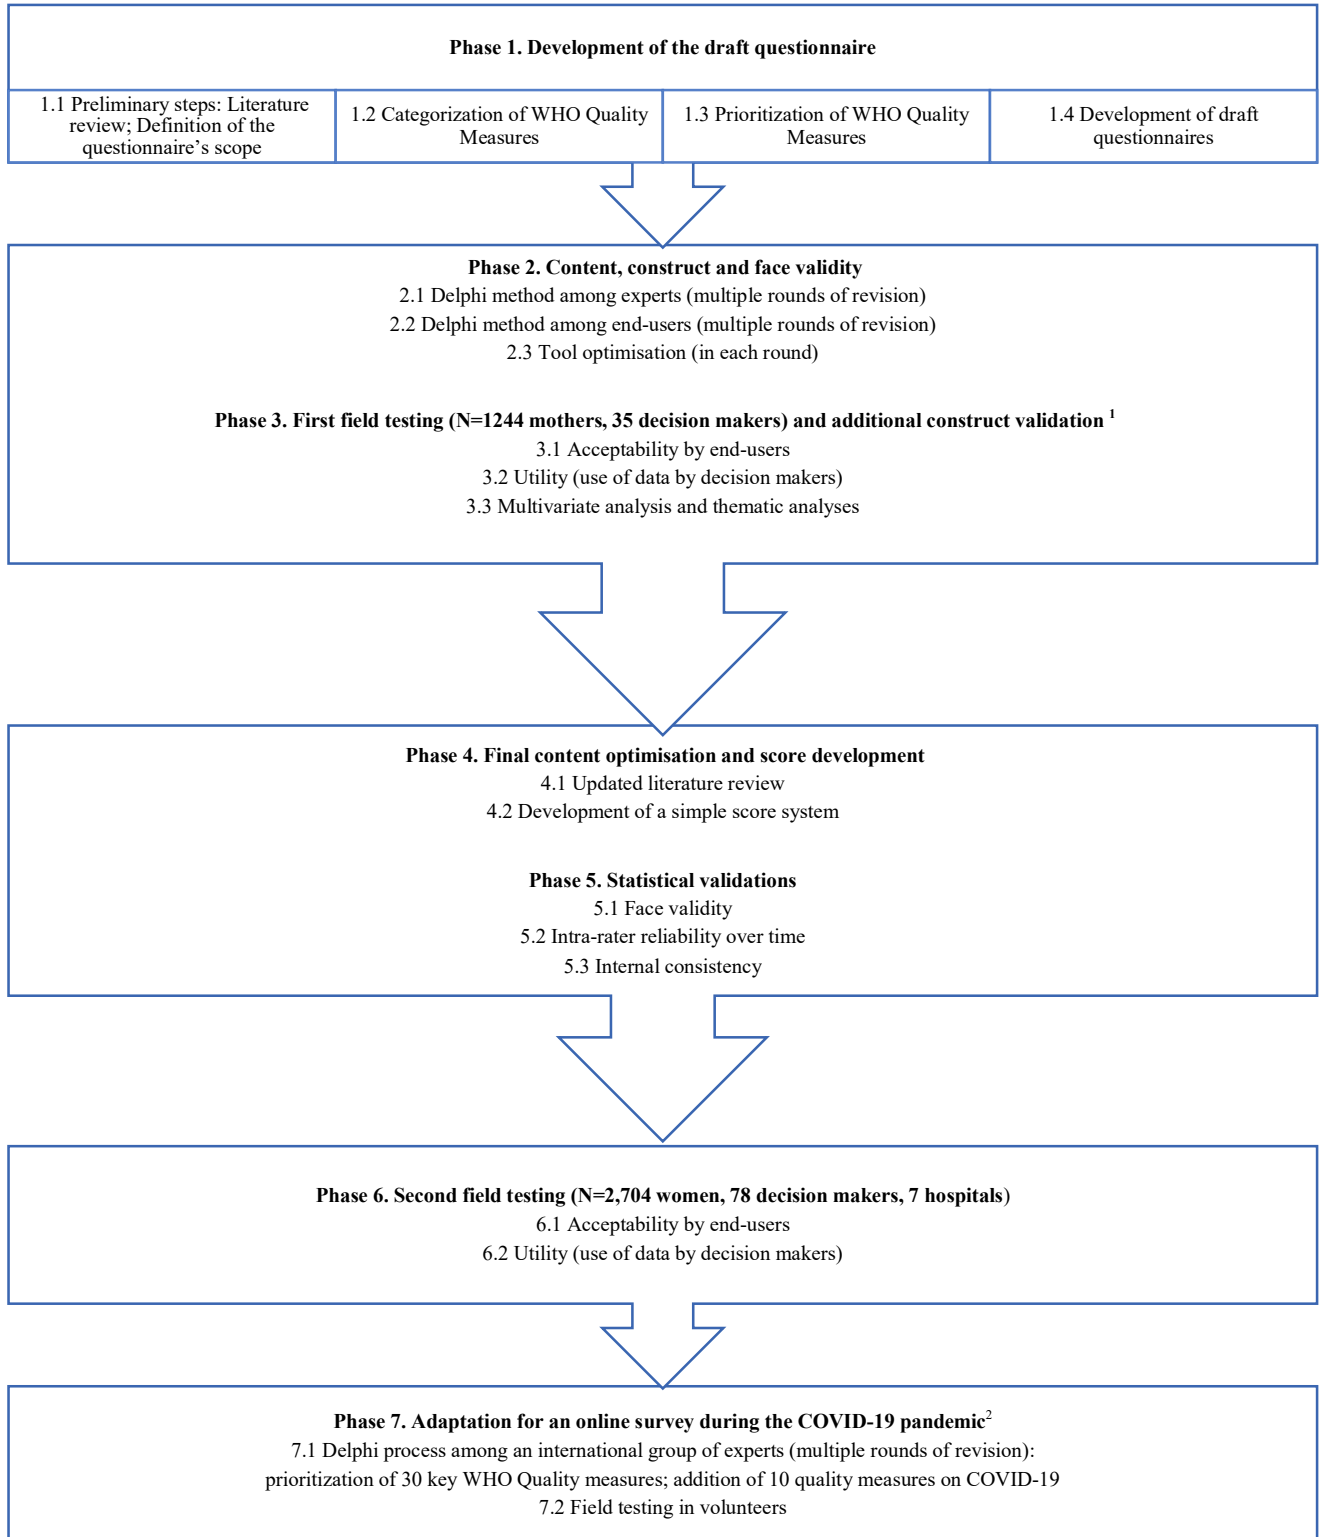

### **Additional details on Phase 7**

During the first months of the COVID-19 pandemic, the questionnaire was further optimized and adapted for an online survey. Specifically:

- 1 The online format was chosen due to lower costs of dissemination and possibility of quicker responses in many countries (1-3). The questionnaire was shortened to 30 key WHO Quality measures in order to improve acceptability and questions were adapted for an online survey, ie. including clear explanations for women (such as, for example, the meaning of “active labour” in order to standardized answers).
- 2 To be able to collect data related to the emergency, 10 key questions relevant to the COVID-19 pandemic, prioritized among recommended indicators in existing WHO guidelines, professional association statements, protocols released by European countries (4-24), were added.

Questions were selected through a Delphi process, including 26 experts from 11 countries of the WHO European Region with the following different backgrounds: clinical staff directly involved in the QMNC, sociologists, psychologist, anthropologist, public health experts, lactation consultants and reproductive rights advocates. Experts were asked to assess comprehensiveness and clarity of the questions, suggest rewording or additional relevant questions if necessary, using and *ad hoc* template. Criteria to reach consensus were pre-defined (25). The final questionnaire was field tested in volunteers’ mothers.

### **References**

- 1) Lazzerini M, Valente EP, Covi B, et al Use of WHO standards to improve quality of maternal and newborn hospital care: a study collecting both mothers’ and staff perspective in a tertiary care hospital in Italy. *BMJ Open Quality* 2019;8:e000525. doi: 10.1136/bmjopen-2018-000525
- 2) Lazzerini M, Mariani I, Semenzato C, Valente EP. Association between maternal satisfaction and other indicators of quality of care at childbirth: a cross-sectional study based on the WHO standards. *BMJ Open*. 2020 Sep 14;10(9):e037063. doi: 10.1136/bmjopen-2020-037063.
- 3) Lazzerini M, Semenzato C, Kaur J, Covi B, Argentini G. Women's suggestions on how to improve the quality of maternal and newborn hospital care: a qualitative study in Italy using the WHO standards as framework for the analysis. *BMC Pregnancy Childbirth*. 2020 Apr 6;20(1):200.
- 4) Braithwaite D, Emery J, Lusignana S, Sutton S. Using the Internet to conduct surveys of health professionals: a valid alternative? *Family Practice* 2003;20:5 doi: 10.1093/fampra/cm9509
- 5) Lusk C, Delclos GL, Burau K, Drawhorn DD, Aday LA. Mail Versus Internet Surveys: Determinants of Method of Response Preferences Among Health Professionals. *Evaluation & the Health Professions* 2007;30(2):186-201. doi:10.1177/0163278707300634
- 6) Audibert C, Glass D, Johnson TP. Method and transparency of online physician surveys: an overview. *Survey Methods: Insights from the Field* 2020. doi:10.13094/SMIF-2020-00001

- 7) World Health organization. Considerations for public health and social measures in the workplace in the context of COVID-19. 10 May 2020. Available at <https://www.who.int/publications-detail/considerations-for-public-health-and-social-measures-in-the-workplace-in-the-context-of-covid-19>
- 8) WHO. Clinical management of severe acute respiratory infection (SARI) when COVID-19 disease is suspected. Interim guidance 13 March 2020. ([https://www.who.int/publications-detail/clinical-management-of-severe-acute-respiratory-infection-when-novel-coronavirus-\(ncov\)-infection-is-suspected](https://www.who.int/publications-detail/clinical-management-of-severe-acute-respiratory-infection-when-novel-coronavirus-(ncov)-infection-is-suspected))
- 9) World Health organization. Addressing Human Rights as Key to the COVID-19 Response 21 April 2020. Available at <https://www.who.int/publications/i/item/addressing-human-rights-as-key-to-the-covid-19-response> (accessed on 28th April 2021)
- 10) World Health organization. Gender and COVID-19. Advocacy brief 14 May 2020. Available at World Health organization. Gender and COVID-19. Advocacy brief 14 May 2020. (accessed on 22th June 2020)
- 11) World Health organization. Pregnancy, Childbirth, breastfeeding and COVID-19. Available at: <https://www.who.int/reproductivehealth/publications/emergencies/COVID-19-pregnancy-ipc-breastfeeding-infographics/en/> (accessed on 16th April, 2020)
- 12) World Health organization. Q&A on COVID-19, pregnancy, childbirth and breastfeeding. Available at <https://www.who.int/news-room/q-a-detail/q-a-on-covid-19-pregnancy-childbirth-and-breastfeeding> (accessed on 16th April, 2020)
- 13) World Health organization. FREQUENTLY ASKED QUESTIONS: Breastfeeding and COVID-19 For health care workers. Available at [https://www.who.int/docs/default-source/maternal-health/faqs-breastfeeding-and-covid-19.pdf?sfvrsn=d839e6c0\\_1](https://www.who.int/docs/default-source/maternal-health/faqs-breastfeeding-and-covid-19.pdf?sfvrsn=d839e6c0_1) accessed April 29, 2020)
- 14) World Health organization. Maintaining essential health services: operational guidance for the COVID-19 context. Interim guidance 1 June 2020. Available at <https://apps.who.int/iris/handle/10665/332240> (Accessed 15 April 2020).
- 15) International Confederation of Midwives Protecting midwives to sustain care for women, newborns, and their families in the COVID-19 pandemic. Joint statement. 2020 Available at. <http://www.internationalmidwives.org/assets/files/news-files/2020/05/call-to-action-5eb0b4ee47deb.pdf>
- 16) International Confederation of Midwives. The Hague; 2020. Women's rights in childbirth must be upheld during the coronavirus epidemic. Available at. [http://www.internationalmidwives.org/assets/files/news-files/2020/03/icm-statement\\_upholding-womens-rights-during-covid19-5e83ae2ebfe59.pdf](http://www.internationalmidwives.org/assets/files/news-files/2020/03/icm-statement_upholding-womens-rights-during-covid19-5e83ae2ebfe59.pdf)
- 17) International Confederation of Midwives. Protecting Midwives to Sustain Care for Women, Newborns and their Families in the COVID-19 Pandemic. Global Call to action. Release Date: 5 May 2020 (International Day of the Midwife). Available at <https://www.internationalmidwives.org/assets/files/news-files/2020/05/call-to-action-5eb0b4ee47deb.pdf>.
- 18) NSW Health. COVID-19: Information for women accessing Maternity Services. Available at <https://nswlhd.health.nsw.gov.au/kids-families-health-services/pregnancy-birth-newborn-services/covid-19-information-for-women-accessing-maternity-services/> (accessed on 16th April 2020)
- 19) Istituto Superiore di Sanità. Epicentro. COVID-19 in gravidanza, parto e allattamento: . Available at: <https://www.epicentro.iss.it/coronavirus/sars-cov-2-gravidanza-parto-allattamento> (accessed on 28th April, 2020)

- 20) SIN. ALLATTAMENTO e INFEZIONE da SARS-CoV-2 (Coronavirus Disease 2019 - COVID-19). Indicazioni ad interim della Società Italiana di Neonatologia (SIN) Versione 2. 22 marzo 2020. Available at: <https://sip.it/2020/05/14/allattamento-e-gestione-del-neonato-in-corso-di-pandemia-da-sars-cov-2-indicazioni-ad-interim-della-societa-italiana-di-neonatologia-sin/> (accessed 3th April 2020).
- 21) Giusti A, Zambri F, Marchetti F, Sampaolo L, Taruscio D, Salerno P, Chiantera A, Colacurci N, Davanzo R, Mosca F, Petrini F, Ramenghi L, Vicario M, Villani A, Viora E, Zanetto F, Donati S. Indicazioni ad interim per gravidanza, parto, allattamento e cura dei piccolissimi di 0-2 anni in risposta all'emergenza COVID-19. Versione 31 maggio 2020. Roma: Istituto Superiore di Sanità; 2020 (Rapporto ISS COVID-19 n. 45/2020)
- 22) Poon LC, Yang H, Kapur A, Melamed N, Dao B, Divakar H, David McIntyre H, Kihara AB, Ayres-de-Campos D, Ferrazzi EM, Carlo Di Renzo G, Hod M. Global interim guidance on coronavirus disease 2019 (COVID-19) during pregnancy and puerperium from FIGO and allied partners: Information for healthcare professionals. *Int J Gynaecol Obstet* 2020. doi: 10.1002/ijgo.13156.
- 23) Royal College of Obstetricians and Gynaecologists, The Royal College of Midwives UK, Royal College of Paediatrics and Child Health, Royal College of Anaesthetists & Obstetric Anaesthetists' Association. Coronavirus (COVID-19) Infection in Pregnancy Information for healthcare professionals. Version 9: Published Wednesday 13 May 2020 (2020).
- 24) Birthrights HUMAN RIGHTS CHARITY CALLS FOR PROTECTION OF UK WOMEN IN CHILDBIRTH DURING NATIONAL EMERGENCY. Statement. 2020 Available at. <https://www.birthrights.org.uk/wp-content/uploads/2020/03/Final-Covid-19-Birthrights-31.3.20.pdf>
- 25) Victoria G. Vivilaki, Eleni Asimaki. Respectful midwifery care during the COVID-19 pandemic. *Eur J Midwifery* 2020;4(April):8. doi:10.18332/ejm/120070
- 26) Lazzarini M, Barbi E, Apicella A, Marchetti F, Cardinale F, Trobia G. Delayed access or provision of care in Italy resulting from fear of COVID-19. *Lancet Child Adolesc Health*. 2020;4(5):e10-e11. doi:10.1016/S2352-4642(20)30108-5
- 27) Legido-Quigley H, Mateos-García JT, Campos VR, Gea-Sánchez M, Muntaner C, McKee M. The resilience of the Spanish health system against the COVID-19 pandemic. *Lancet Public Health*. 2020;5(5):e251-e252. doi:10.1016/S2468-2667(20)30060-
- 28) Taherdoost H. Validity and Reliability of the Research Instrument; How to Test the Validation of a Questionnaire/Survey in a Research. *International Journal of Academic Research in Management* 2016;5(3):28-36.



### Supplementary Table 3 Quality of maternal and neonatal care index score system

|                                              | Number of questions | Score options for each answer | Total score (range) |
|----------------------------------------------|---------------------|-------------------------------|---------------------|
| Provision of care                            | 10                  | 0, 5, 10                      | 0 - 100             |
| Experience of care                           | 10                  | 0, 5, 10                      | 0 - 100             |
| Availability of physical and human resources | 10                  | 0, 5, 10                      | 0 - 100             |
| COVID-19                                     | 10                  | 0, 5, 10                      | 0 - 100             |
| QMNC Index                                   | 40                  | 0, 5, 10                      | 0 - 400             |

Abbreviation: QMNC = Quality of maternal and neonatal care

**Supplementary Table 4 Proportion of participants compared to expected number of births within the study period based on 2019 data by country**

| Country   | Sample collected in each country | Contribution to total sample (% of N=21027) | Country births 2019 | % of births collected on total birth in 12 months* |
|-----------|----------------------------------|---------------------------------------------|---------------------|----------------------------------------------------|
| Norway    | 3220                             | 15.3                                        | 54404               | 5.9                                                |
| Luxemburg | 441                              | 2.1                                         | 6320                | 7.0                                                |
| Slovenia  | 2092                             | 9.9                                         | 18794               | 11.1                                               |
| Sweden    | 4800                             | 22.8                                        | 114523              | 4.2                                                |
| Portugal  | 1685                             | 8.0                                         | 86579               | 2.0                                                |
| Croatia   | 458                              | 2.2                                         | 35985               | 1.3                                                |
| Italy     | 4813                             | 22.9                                        | 420084              | 1.2                                                |
| Serbia    | 630                              | 3.0                                         | 64757               | 1.0                                                |
| Romania   | 571                              | 2.7                                         | 185677              | 0.3                                                |
| Germany   | 1081                             | 5.1                                         | 778100              | 0.1                                                |
| France    | 544                              | 2.6                                         | 753000              | 0.1                                                |
| Spain     | 347                              | 1.7                                         | 360617              | 0.1                                                |

Notes: \* Women who gave birth from March 1, 2020 up to the end of the data collection period (March 15, 2021) were invited to participate in an online survey; data collection approximated to 12 months.

**Supplementary Table 5 Comparison of the characteristics of responders between women who underwent labour and women with prelabour caesarean section**

|                                                                                  | Women who underwent labour<br>N=18063<br>n (%) | Women with prelabour caesarean section<br>N=2964<br>n (%) | p value |
|----------------------------------------------------------------------------------|------------------------------------------------|-----------------------------------------------------------|---------|
| <b>Country</b>                                                                   |                                                |                                                           |         |
| Italy                                                                            | 3973 (22· 0)                                   | 840 (28· 3)                                               | <0· 001 |
| Sweden                                                                           | 4355 (24· 1)                                   | 445 (15· 0)                                               | <0· 001 |
| Norway                                                                           | 2989 (16· 5)                                   | 231 (7· 8)                                                | <0· 001 |
| Slovenia                                                                         | 1838 (10· 2)                                   | 254 (8· 6)                                                | 0· 007  |
| Portugal                                                                         | 1298 (7· 2)                                    | 387 (13· 1)                                               | <0· 001 |
| Germany                                                                          | 949 (5· 3)                                     | 132 (4· 5)                                                | 0· 067  |
| Serbia                                                                           | 478 (2· 6)                                     | 152 (5· 1)                                                | <0· 001 |
| Romania                                                                          | 315 (1· 7)                                     | 256 (8· 6)                                                | <0· 001 |
| France                                                                           | 497 (2· 8)                                     | 47 (1· 6)                                                 | <0· 001 |
| Croatia                                                                          | 398 (2· 2)                                     | 60 (2· 0)                                                 | 0· 536  |
| Luxembourg                                                                       | 382 (2· 1)                                     | 59 (2· 0)                                                 | 0· 662  |
| Spain                                                                            | 309 (1· 7)                                     | 38 (1· 3)                                                 | 0· 090  |
| Other countries <sup>1</sup>                                                     | 282 (1· 6)                                     | 63 (2· 1)                                                 | 0· 025  |
| <b>Year of birth</b>                                                             |                                                |                                                           |         |
| 2020                                                                             | 16366 (90· 6)                                  | 2731 (92· 1)                                              | <0· 001 |
| 2021                                                                             | 1181 (6· 5)                                    | 119 (4· 0)                                                | 0· 007  |
| Missing                                                                          | 516 (2· 9)                                     | 114 (3· 8)                                                | 0· 003  |
| <b>Gave birth in the same country where were born</b>                            |                                                |                                                           |         |
| Yes                                                                              | 16367 (90· 6)                                  | 2654 (89· 5)                                              | 0· 066  |
| No                                                                               | 1301 (7· 2)                                    | 222 (7· 5)                                                | 0· 576  |
| Missing                                                                          | 395 (2· 2)                                     | 88 (3· 0)                                                 | 0· 008  |
| <b>Age range</b>                                                                 |                                                |                                                           |         |
| 18-24                                                                            | 880 (4· 9)                                     | 69 (2· 3)                                                 | <0· 001 |
| 25-30                                                                            | 6541 (36· 2)                                   | 782 (26· 4)                                               | <0· 001 |
| 31-35                                                                            | 7068 (39· 1)                                   | 1145 (38· 6)                                              | 0· 605  |
| 36-39                                                                            | 2472 (13· 7)                                   | 598 (20· 2)                                               | <0· 001 |
| ≥40                                                                              | 710 (3· 9)                                     | 282 (9· 5)                                                | <0· 001 |
| Missing                                                                          | 392 (2· 2)                                     | 88 (3· 0)                                                 | 0· 007  |
| <b>Educational level <sup>2</sup></b>                                            |                                                |                                                           |         |
| None                                                                             | 7 (0· 0)                                       | 1 (0· 0)                                                  | 0· 897  |
| Elementary school                                                                | 40 (0· 2)                                      | 6 (0· 2)                                                  | 0· 837  |
| Junior High school                                                               | 931 (5· 2)                                     | 169 (5· 7)                                                | 0· 215  |
| High School                                                                      | 4413 (24· 4)                                   | 739 (24· 9)                                               | 0· 556  |
| University degree                                                                | 7580 (42· 0)                                   | 1145 (38· 6)                                              | 0· 001  |
| Postgraduate degree / Master's /Doctorate or higher                              | 4699 (26· 0)                                   | 816 (27· 5)                                               | 0· 082  |
| Missing                                                                          | 393 (2· 2)                                     | 88 (3· 0)                                                 | 0· 007  |
| <b>Parity</b>                                                                    |                                                |                                                           |         |
| 1                                                                                | 10906 (60· 4)                                  | 1648 (55· 6)                                              | <0· 001 |
| >1                                                                               | 6764 (37· 4)                                   | 1228 (41· 4)                                              | <0· 001 |
| Missing                                                                          | 393 (2· 2)                                     | 88 (3· 0)                                                 | 0· 007  |
| <b>Type of facility</b>                                                          |                                                |                                                           |         |
| Public                                                                           | 16684 (92· 4)                                  | 2476 (83· 5)                                              | <0· 001 |
| Private                                                                          | 986 (5· 5)                                     | 401 (13· 5)                                               | <0· 001 |
| Missing                                                                          | 393 (2· 2)                                     | 87 (2· 9)                                                 | 0· 010  |
| <b>Type of healthcare providers who directly assisted the birth <sup>3</sup></b> |                                                |                                                           |         |
| Midwife                                                                          | 16371 (90· 6)                                  | 1782 (60· 1)                                              | <0· 001 |
| Nurse                                                                            | 6337 (35· 1)                                   | 1731 (58· 4)                                              | <0· 001 |
| A student (ie, before graduation)                                                | 3171 (17· 6)                                   | 279 (9· 4)                                                | <0· 001 |
| Obstetrics registrar / medical resident (under post-graduate training)           | 3003 (16· 6)                                   | 777 (26· 2)                                               | <0· 001 |
| Obstetrician-gynaecologist doctor                                                | 8470 (46· 9)                                   | 2406 (81· 2)                                              | <0· 001 |
| I don't know (healthcare providers did not introduce themselves)                 | 1455 (8· 1)                                    | 347 (11· 7)                                               | <0· 001 |
| Other                                                                            | 2442 (13· 5)                                   | 587 (19· 8)                                               | <0· 001 |
| <b>Other characteristics</b>                                                     |                                                |                                                           |         |
| Newborn admitted in neonatal intensive or semi-intensive care unit               | 1311 (7· 3)                                    | 429 (14· 5)                                               | <0· 001 |
| Mother admitted in intensive care unit                                           | 201 (1· 1)                                     | 146 (4· 9)                                                | <0· 001 |
| Multiple birth                                                                   | 139 (0· 8)                                     | 121 (4· 1)                                                | <0· 001 |

Notes: <sup>1</sup> Other countries: Belgium (n=122); Austria (n=41); UK (n=36); Finland (n=28); Bosnia Herzegovina (n=27); Switzerland (n=21); Denmark (n=15); Greece, Ireland, Netherlands, Ukraine, Andorra, Montenegro, Russian Federation, Lithuania, Iceland, Poland, Turkey, Hungary, Albania, Cyprus, Latvia, Macedonia, and Czech Republic (each fewer than 10 cases); <sup>2</sup> Wording on education levels agreed

among partners during the Delphi; questionnaire translated and back translated according to ISPOR Task Force 25 for Translation and Cultural Adaptation Principles of Good Practice;<sup>3</sup> More than one possible answer.

## Supplementary Table 6 Results on provision of care

### Women who underwent labour

|                                                | Overall                 | Croatia                  | France                  | Germany                 | Italy                   | Luxembourg           | Norway                  | Portugal                | Romania                 | Serbia                  | Slovenia                | Spain                   | Sweden                  | Other countries      |
|------------------------------------------------|-------------------------|--------------------------|-------------------------|-------------------------|-------------------------|----------------------|-------------------------|-------------------------|-------------------------|-------------------------|-------------------------|-------------------------|-------------------------|----------------------|
|                                                | n<br>(%)                | n<br>(%)                 | n<br>(%)                | n<br>(%)                | n<br>(%)                | n<br>(%)             | n<br>(%)                | n<br>(%)                | n<br>(%)                | n<br>(%)                | n<br>(%)                | n<br>(%)                | n<br>(%)                | n<br>(%)             |
| N                                              | 18063                   | 398                      | 497                     | 949                     | 3973                    | 382                  | 2989                    | 1298                    | 315                     | 478                     | 1838                    | 309                     | 4355                    | 282                  |
| 1. No pain relief during labour                | 20·8<br>(20·2;<br>21·4) | 33·4<br>(28·8;<br>38·1)  | 6·4 (4·3;<br>8·6)       | 23 (20·3;<br>25·6)      | 43·3<br>(41·8;<br>44·8) | 10·2 (7·2;<br>13·2)  | 12·7<br>(11·5;<br>13·9) | 7·2 (5·8;<br>8·6)       | 42·2<br>(36·8;<br>47·7) | 46·2<br>(41·8;<br>50·7) | 21·5<br>(19·7;<br>23·4) | 11 (7·5;<br>14·5)       | 7·2 (6·4;<br>8·0)       | 18·8 (14·2;<br>23·4) |
| 2. Mode of birth                               |                         |                          |                         |                         |                         |                      |                         |                         |                         |                         |                         |                         |                         |                      |
| 2a. IVB                                        | 10·7<br>(10·2;<br>11·1) | 2·8 (1·2;<br>4·4)        | 19·3<br>(15·8;<br>22·8) | 8·9 (7·0;<br>10·7)      | 8·6<br>(7·8;<br>9·5)    | 16·8 (13;<br>20·5)   | 13·5<br>(12·3;<br>14·8) | 30·8<br>(28·3;<br>33·3) | 1·6 (0·2;<br>3·0)       | 2·7 (1·3;<br>4·2)       | 4·0 (3·1;<br>4·9)       | 18·1<br>(13·8;<br>22·4) | 8·1 (7·3;<br>8·9)       | 9·2 (5·8; 12·6)      |
| 2b. ECS during labour                          | 11·2<br>(10·8;<br>11·7) | 11·1 (8·0;<br>14·1)      | 6·8 (4·6;<br>9·1)       | 17·1<br>(14·7;<br>19·5) | 12·7<br>(11·7;<br>13·7) | 13·4 (9·9;<br>16·8)  | 8·9 (7·9;<br>9·9)       | 14·3<br>(12·4;<br>16·2) | 32·1<br>(26·9;<br>37·2) | 8·8 (6·2;<br>11·3)      | 8·8 (7·5;<br>10·1)      | 12 (8·4;<br>15·6)       | 9·1 (8·3;<br>10)        | 13·5 (9·5;<br>17·5)  |
| 3a. Episiotomy (in SVB)                        | 20·1<br>(19·4;<br>20·7) | 48·1<br>(42·8;<br>53·4)  | 10·9 (7·7;<br>14·1)     | 13·1<br>(10·6;<br>15·6) | 19·6<br>(18·2;<br>21)   | 15 (10·7;<br>19·3)   | 16·6<br>(15·1;<br>18·1) | 40·7<br>(37·1;<br>44·3) | 66 (59·6;<br>72·4)      | 59·3<br>(54·7; 64)      | 31 (28·7;<br>33·3)      | 21·3<br>(15·8;<br>26·8) | 6·1 (5·3;<br>6·9)       | 25·7 (19·9;<br>31·5) |
| 3b. Fundal pressure (in IVB)                   | 41·2 (39;<br>43·4)      | 90·9<br>(73·9;<br>107·9) | 11·5 (5·1;<br>17·8)     | 65·5<br>(55·3;<br>75·6) | 67·9<br>(63;<br>72·9)   | 31·2 (19·9;<br>42·6) | 18 (14·3;<br>21·8)      | 49·2<br>(44·4;<br>54·1) | 100 (100;<br>100)       | 84·6 (65;<br>104·2)     | 95·9<br>(91·5;<br>100)  | 48·2<br>(35·1;<br>61·3) | 21·4<br>(17·1;<br>25·7) | 26·9 (9·9; 44)       |
| 3c. No pain relief after CS                    | 15·2<br>(13·6;<br>16·8) | 11·4 (2·0;<br>20·7)      | 32·4<br>(16·6;<br>48·1) | 11·7 (6·8;<br>16·7)     | 13·1<br>(10·1;<br>16)   | 13·7 (4·3;<br>23·2)  | 18·4<br>(13·8;<br>23·1) | 10·8 (6·3;<br>15·2)     | 10·9 (4·8;<br>17)       | 4·8 (0·0;<br>11·2)      | 8·7 (4·3;<br>13)        | 21·6 (8·4;<br>34·9)     | 23·1 (19;<br>27·3)      | 10·5 (0·8;<br>20·3)  |
| 4. No skin to skin                             | 9·1 (8·7;<br>9·5)       | 9·0 (6·2;<br>11·9)       | 4·8 (2·9;<br>6·7)       | 1·7 (0·9;<br>2·5)       | 14·5<br>(13·4;<br>15·6) | 0·5 (0·0; 1·2)       | 3·5 (2·9;<br>4·2)       | 16·6<br>(14·6;<br>18·7) | 64·4<br>(59·2;<br>69·7) | 30·5<br>(26·4;<br>34·7) | 8·8 (7·5;<br>10·1)      | 4·5 (2·2;<br>6·8)       | 2·9 (2·4;<br>3·4)       | 5·3 (2·7; 7·9)       |
| 5. No early breastfeeding                      | 12·9<br>(12·5;<br>13·4) | 25·1<br>(20·9;<br>29·4)  | 18·9<br>(15·5;<br>22·4) | 5·6 (4·1;<br>7·0)       | 17·1<br>(15·9;<br>18·3) | 4·7 (2·6; 6·8)       | 8·6 (7·6;<br>9·6)       | 6·3 (5·0;<br>7·6)       | 62·9<br>(57·5;<br>68·2) | 69·9<br>(65·8; 74)      | 8·1 (6·9;<br>9·4)       | 7·1 (4·3;<br>10)        | 7·4 (6·7;<br>8·2)       | 10·3 (6·7;<br>13·8)  |
| 6. Inadequate breastfeeding support            | 31·2<br>(30·5;<br>31·8) | 35·4<br>(30·7;<br>40·1)  | 32·8<br>(28·7;<br>36·9) | 27·1<br>(24·3;<br>29·9) | 36·3<br>(34·8;<br>37·8) | 16·5 (12·8;<br>20·2) | 20·5<br>(19·1; 22)      | 25·9<br>(23·5;<br>28·3) | 48·3<br>(42·7;<br>53·8) | 56·9<br>(52·5;<br>61·3) | 22·9<br>(20·9;<br>24·8) | 27·2<br>(22·2;<br>32·1) | 37·2<br>(35·8;<br>38·7) | 23 (18·1; 28)        |
| 7. No rooming-in                               | 19·4<br>(18·8; 20)      | 37·2<br>(32·4;<br>41·9)  | 9·9 (7·2;<br>12·5)      | 10 (8·1;<br>11·9)       | 21·7<br>(20·5;<br>23)   | 5·5 (3·2; 7·8)       | 21·2<br>(19·7;<br>22·7) | 5·8 (4·5;<br>7·0)       | 40·0<br>(34·6;<br>45·4) | 55·6<br>(51·2;<br>60·1) | 23·6<br>(21·7;<br>25·6) | 8·7 (5·6;<br>11·9)      | 16·8<br>(15·7;<br>17·9) | 12·4 (8·6;<br>16·3)  |
| 8. Not allowed to stay with the baby as wished | 7·0 (6·7;<br>7·4)       | 7·0 (4·5;<br>9·5)        | 2·0 (0·8;<br>3·2)       | 1·6 (0·8;<br>2·4)       | 7·1<br>(6·3;<br>7·9)    | 0·3 (0·0; 0·8)       | 3·6 (2·9;<br>4·3)       | 3·3 (2·3;<br>4·3)       | 22·2<br>(17·6;<br>26·8) | 39·7<br>(35·4;<br>44·1) | 4·5 (3·5;<br>5·4)       | 2·3 (0·6;<br>3·9)       | 9·7 (8·8;<br>10·5)      | 4·3 (1·9; 6·6)       |
| 9. No exclusive breastfeeding at discharge     | 27·7 (27;<br>28·4)      | 42 (37·1;<br>46·8)       | 36·6<br>(32·4;<br>40·9) | 25·4<br>(22·6;<br>28·2) | 29·7<br>(28·3;<br>31·1) | 24·9 (20·5;<br>29·2) | 23·2<br>(21·6;<br>24·7) | 22·3<br>(20·1;<br>24·6) | 44·1<br>(38·6;<br>49·6) | 39·5<br>(35·2;<br>43·9) | 34·3<br>(32·2;<br>36·5) | 17·5<br>(13·2;<br>21·7) | 24·9<br>(23·6;<br>26·2) | 20·9 (16·2;<br>25·7) |
| 10. No immediate attention when needed         | 31·4<br>(30·7;<br>32·1) | 30·7<br>(26·1;<br>35·2)  | 34·0<br>(29·8;<br>38·2) | 24·9<br>(22·1;<br>27·6) | 31·5<br>(30·0;<br>32·9) | 20·2 (16·1;<br>24·2) | 30·9<br>(29·3;<br>32·6) | 30·8<br>(28·3;<br>33·3) | 43·8<br>(38·3;<br>49·3) | 60·7<br>(56·3;<br>65·0) | 31·1 (29;<br>33·2)      | 23·3<br>(18·6;<br>28·0) | 31·0<br>(29·6;<br>32·3) | 26·6 (21·4;<br>31·8) |

### Women with prelabour caesarean section

|                                                | Overall<br>n<br>(%)     | Croatia<br>n<br>(%)  | France<br>n<br>(%)      | Germany<br>n<br>(%)  | Italy<br>n<br>(%)       | Luxembourg<br>n<br>(%) | Norway<br>n<br>(%)      | Portugal<br>n<br>(%) | Romania<br>n<br>(%)     | Serbia<br>n<br>(%)   | Slovenia<br>n<br>(%)    | Spain<br>n<br>(%)    | Sweden<br>n<br>(%)      | Other countries<br>n<br>(%) |
|------------------------------------------------|-------------------------|----------------------|-------------------------|----------------------|-------------------------|------------------------|-------------------------|----------------------|-------------------------|----------------------|-------------------------|----------------------|-------------------------|-----------------------------|
| N                                              | 2964                    | 60                   | 47                      | 132                  | 840                     | 59                     | 231                     | 387                  | 256                     | 152                  | 254                     | 38                   | 445                     | 63                          |
| 1. Mode of birth                               |                         |                      |                         |                      |                         |                        |                         |                      |                         |                      |                         |                      |                         |                             |
| 1a. Elective CS                                | 67.3<br>(65.6; 69)      | 63.3 (51.1;<br>75.5) | 66.0<br>(52.4;<br>79.5) | 80.3 (73.5;<br>87.1) | 64.2<br>(60.9;<br>67.4) | 74.6 (63.5;<br>85.7)   | 61.9<br>(55.6;<br>68.2) | 68.2 (63.6;<br>72.9) | 73.0<br>(67.6;<br>78.5) | 72.4 (65.3;<br>79.5) | 72.8<br>(67.4;<br>78.3) | 55.3 (39.5;<br>71.1) | 64.5 (60;<br>68.9)      | 63.5 (51.6;<br>75.4)        |
| 1b. ECS before labour                          | 32.7<br>(31.0;<br>34.4) | 36.7 (24.5;<br>48.9) | 34.0<br>(20.5;<br>47.6) | 19.7 (12.9;<br>26.5) | 35.8<br>(32.6;<br>39.1) | 25.4 (14.3;<br>36.5)   | 38.1<br>(31.8;<br>44.4) | 31.8 (27.1;<br>36.4) | 27.0<br>(21.5;<br>32.4) | 27.6 (20.5;<br>34.7) | 27.2<br>(21.7;<br>32.6) | 44.7 (28.9;<br>60.5) | 35.5<br>(31.1; 40)      | 36.5 (24.6;<br>48.4)        |
| 2. No pain relief after CS                     | 13.2<br>(12.0;<br>14.4) | 5.0 (0.0;<br>10.5)   | 38.3<br>(24.4;<br>52.2) | 15.2 (9.0;<br>21.3)  | 13.3<br>(11;<br>15.6)   | 6.8 (0.4; 13.2)        | 13.0<br>(8.7;<br>17.3)  | 10.1 (7.1;<br>13.1)  | 10.2 (6.5;<br>13.9)     | 11.2 (6.2;<br>16.2)  | 10.2 (6.5;<br>14.0)     | 7.9 (0.0;<br>16.5)   | 20.2<br>(16.5; 24)      | 4.8 (0.0; 10.0)             |
| 3. No skin to skin                             | 35.0<br>(33.3;<br>36.7) | 45.0 (32.4;<br>57.6) | 27.7<br>(14.9;<br>40.4) | 9.1 (4.2;<br>14.0)   | 38.1<br>(34.8;<br>41.4) | 1.7 (0.0; 5.0)         | 19.5<br>(14.4;<br>24.6) | 30.0 (25.4;<br>34.5) | 71.9<br>(66.4;<br>77.4) | 59.2 (51.4;<br>67)   | 52.0<br>(45.8;<br>58.1) | 23.7 (10.2;<br>37.2) | 16.9<br>(13.4;<br>20.3) | 20.6 (10.6;<br>30.6)        |
| 4. No early breastfeeding                      | 35.7 (34;<br>37.5)      | 61.7 (49.4;<br>74)   | 40.4<br>(26.4;<br>54.5) | 15.9 (9.7;<br>22.1)  | 37.1<br>(33.9;<br>40.4) | 8.5 (1.4; 15.6)        | 31.2<br>(25.2;<br>37.1) | 14.5 (11.0;<br>18.0) | 73.8<br>(68.4;<br>79.2) | 74.3 (67.4;<br>81.3) | 45.7<br>(39.5;<br>51.8) | 28.9 (14.5;<br>43.4) | 21.1<br>(17.3;<br>24.9) | 22.2 (12; 32.5)             |
| 5. Inadequate breastfeeding support            | 37.3<br>(35.6;<br>39.1) | 41.7 (29.2;<br>54.1) | 38.3<br>(24.4;<br>52.2) | 37.1 (28.9;<br>45.4) | 41.8<br>(38.5;<br>45.1) | 18.6 (8.7; 28.6)       | 26.0<br>(20.3;<br>31.6) | 25.6 (21.2;<br>29.9) | 44.9<br>(38.8; 51)      | 48.7 (40.7;<br>56.6) | 27.6<br>(22.1;<br>33.1) | 34.2 (19.1;<br>49.3) | 46.5<br>(41.9;<br>51.2) | 22.2 (12; 32.5)             |
| 6. No rooming-in                               | 36.1<br>(34.4;<br>37.8) | 48.3 (35.7;<br>61.0) | 23.4<br>(11.3;<br>35.5) | 16.7 (10.3;<br>23)   | 39.4<br>(36.1;<br>42.7) | 6.8 (0.4; 13.2)        | 39<br>(32.7;<br>45.2)   | 13.7 (10.3;<br>17.1) | 54.7<br>(48.6;<br>60.8) | 80.3 (73.9;<br>86.6) | 63 (57.1;<br>68.9)      | 15.8 (4.2;<br>27.4)  | 19.3<br>(15.7; 23)      | 25.4 (14.6;<br>36.1)        |
| 7. Not allowed to stay with the baby as wished | 14.3<br>(13.0;<br>15.6) | 13.3 (4.7;<br>21.9)  | 10.6 (1.8;<br>19.5)     | 3.0 (0.1;<br>6.0)    | 14.3<br>(11.9;<br>16.7) | 0.0 (0.0; 0.0)         | 10.8<br>(6.8;<br>14.8)  | 5.2 (3.0;<br>7.4)    | 25.4<br>(20.1;<br>30.7) | 53.3 (45.4;<br>61.2) | 13.8 (9.5;<br>18)       | 5.3 (0.0;<br>12.4)   | 10.6 (7.7;<br>13.4)     | 19.0 (9.4;<br>28.7)         |
| 8. No exclusive breastfeeding at discharge     | 47.0<br>(45.2;<br>48.8) | 46.7 (34;<br>59.3)   | 46.8<br>(32.5;<br>61.1) | 44.7 (36.2;<br>53.2) | 50.2<br>(46.9;<br>53.6) | 39.0 (26.5;<br>51.4)   | 41.6<br>(35.2;<br>47.9) | 41.9 (36.9;<br>46.8) | 60.2<br>(54.2;<br>66.2) | 48.0 (40.1;<br>56.0) | 44.9<br>(38.8;<br>51.0) | 44.7 (28.9;<br>60.5) | 45.4<br>(40.8; 50)      | 31.7 (20.3;<br>43.2)        |
| 9. No immediate attention when needed          | 35.6<br>(33.9;<br>37.3) | 28.3 (16.9;<br>39.7) | 40.4<br>(26.4;<br>54.5) | 28.0 (20.4;<br>35.7) | 34.2<br>(31;<br>37.4)   | 27.1 (15.8;<br>38.5)   | 39.8<br>(33.5;<br>46.1) | 29.2 (24.7;<br>33.7) | 41.0 (35;<br>47.0)      | 46.7 (38.8;<br>54.6) | 31.1<br>(25.4;<br>36.8) | 21.1 (8.1;<br>34)    | 43.8<br>(39.2;<br>48.4) | 25.4 (14.6;<br>36.1)        |
| 10. No timely care by HCP at facility arrival  | 14.7<br>(13.4;<br>16.0) | 5.0 (0.0;<br>10.5)   | 19.1 (7.9;<br>30.4)     | 21.2 (14.2;<br>28.2) | 14.9<br>(12.5;<br>17.3) | 6.8 (0.4; 13.2)        | 14.3<br>(9.8;<br>18.8)  | 14.5 (11.0;<br>18.0) | 16.0<br>(11.5;<br>20.5) | 34.9 (27.3;<br>42.4) | 10.2 (6.5;<br>14)       | 15.8 (4.2;<br>27.4)  | 10.1 (7.3;<br>12.9)     | 9.5 (2.3; 16.8)             |

## Notes

All the indicators in the domain of provision of care are directly based on WHO standards.

Indicators identified with letters (eg, 3a, 3b) were tailored to take into account different mode of birth (ie, spontaneous vaginal, instrumental vaginal, and caesarean section). These were calculated on subsamples (eg, 3a was calculated on spontaneous vaginal births; 3b was calculated on instrumental vaginal births).

Abbreviations: CS = caesarean section; ECS = emergency caesarean section; HCP = health care provider; IVB= instrumental vaginal birth; SVB = spontaneous vaginal birth

## Supplementary Table 7 Results on experience of care

### Women who underwent labour

|                                              | Overall<br>n<br>(%) | Croatia<br>n<br>(%) | France<br>n<br>(%) | Germany<br>n<br>(%) | Italy<br>n<br>(%) | Luxembourg<br>n<br>(%) | Norway<br>n<br>(%) | Portugal<br>n<br>(%) | Romania<br>n<br>(%) | Serbia<br>n<br>(%) | Slovenia<br>n<br>(%) | Spain<br>n<br>(%) | Sweden<br>n<br>(%) | Other countries<br>n<br>(%) |
|----------------------------------------------|---------------------|---------------------|--------------------|---------------------|-------------------|------------------------|--------------------|----------------------|---------------------|--------------------|----------------------|-------------------|--------------------|-----------------------------|
| N                                            | 18063               | 398                 | 497                | 949                 | 3973              | 382                    | 2989               | 1298                 | 315                 | 478                | 1838                 | 309               | 4355               | 282                         |
| 1. No freedom of movements during labour     | 25.6 (25.0; 26.2)   | 66.8 (62.2; 71.5)   | 25.6 (21.7; 29.4)  | 15.4 (13.1; 17.7)   | 18.0 (16.8; 19.2) | 14.9 (11.3; 18.5)      | 7.9 (6.9; 8.9)     | 46.0 (43.3; 48.7)    | 46.3 (40.8; 51.9)   | 68.2 (64.0; 72.4)  | 51.6 (49.3; 53.9)    | 30.4 (25.3; 35.6) | 20.9 (19.7; 22.1)  | 18.8 (14.2; 23.4)           |
| 2a. No choice of birth position (in SVB)     | 42.8 (42.0; 43.6)   | 81.9 (77.9; 86.0)   | 47.7 (42.6; 52.8)  | 38.3 (34.7; 41.9)   | 32.4 (30.8; 34.1) | 39.0 (33.1; 44.8)      | 32.9 (31.0; 34.8)  | 65.2 (61.7; 68.7)    | 75.6 (69.8; 81.4)   | 80.6 (76.8; 84.4)  | 61.6 (59.2; 64.0)    | 52.3 (45.7; 59.0) | 35.6 (34.0; 37.2)  | 39.4 (33.0; 45.9)           |
| 2b. No consent requested (for IVB)           | 53.6 (51.4; 55.8)   | 81.8 (59.0; 104.6)  | 62.5 (52.8; 72.2)  | 59.5 (49.0; 70.0)   | 62.4 (57.3; 67.5) | 42.2 (30.1; 54.3)      | 43.7 (38.9; 48.5)  | 63.2 (58.5; 68.0)    | 40.0 (0.0; 82.9)    | 69.2 (44.1; 94.3)  | 64.9 (54; 75.7)      | 78.6 (67.8; 89.3) | 35.9 (30.9; 40.9)  | 53.8 (34.7; 73)             |
| 2c. No information on newborn (in ECS)       | 37.7 (35.6; 39.8)   | 38.6 (24.2; 53.0)   | 58.8 (42.3; 75.4)  | 22.2 (15.8; 28.6)   | 32.3 (28.2; 36.4) | 19.6 (8.7; 30.5)       | 35.3 (29.6; 41.1)  | 25.3 (19.0; 31.5)    | 56.4 (46.8; 66.1)   | 59.5 (44.7; 74.4)  | 64.6 (57.2; 72.0)    | 24.3 (10.5; 38.1) | 43.0 (38.1; 47.8)  | 26.3 (12.3; 40.3)           |
| 3. No clear/effective communication from HCP | 30.3 (29.6; 31.0)   | 44.2 (39.3; 49.1)   | 32.6 (28.5; 36.7)  | 19.6 (17.1; 22.1)   | 32.9 (31.4; 34.4) | 17.5 (13.7; 21.4)      | 30.5 (28.8; 32.1)  | 28.3 (25.8; 30.7)    | 44.8 (39.3; 50.3)   | 56.3 (51.8; 60.7)  | 30.8 (28.7; 32.9)    | 25.6 (20.7; 30.4) | 27 (25.6; 28.3)    | 24.1 (19.1; 29.1)           |
| 4. No involvement in choices                 | 34.7 (34.0; 35.3)   | 55.5 (50.6; 60.4)   | 34.6 (30.4; 38.8)  | 28.6 (25.7; 31.4)   | 39.1 (37.6; 40.7) | 21.7 (17.6; 25.9)      | 26.2 (24.6; 27.8)  | 41.6 (38.9; 44.3)    | 50.5 (45.0; 56.0)   | 77.2 (73.4; 81.0)  | 30.6 (28.5; 32.7)    | 34.3 (29.0; 39.6) | 31.3 (29.9; 32.6)  | 27.0 (21.8; 32.1)           |
| 5. Companionship not allowed                 | 62.0 (61.3; 62.7)   | 80.2 (76.2; 84.1)   | 50.9 (46.5; 55.3)  | 57.7 (54.6; 60.9)   | 78.5 (77.2; 79.7) | 20.7 (16.6; 24.7)      | 58.2 (56.4; 59.9)  | 66.7 (64.2; 69.3)    | 94.6 (92.1; 97.1)   | 99.0 (98; 99.9)    | 60.3 (58.1; 62.6)    | 12.6 (8.9; 16.3)  | 51.9 (50.5; 53.4)  | 34.0 (28.5; 39.6)           |
| 6. Not treated with dignity                  | 23.9 (23.3; 24.5)   | 38.9 (34.2; 43.7)   | 23.1 (19.4; 26.8)  | 22.7 (20; 25.3)     | 24.8 (23.4; 26.1) | 12.8 (9.5; 16.2)       | 21.9 (20.4; 23.4)  | 31.5 (29.0; 34)      | 38.4 (33.0; 43.8)   | 59.8 (55.4; 64.2)  | 21.2 (19.3; 23.0)    | 18.8 (14.4; 23.1) | 18.9 (17.7; 20.0)  | 20.2 (15.5; 24.9)           |
| 7. No emotional support                      | 27.4 (26.7; 28)     | 47.7 (42.8; 52.6)   | 27.4 (23.4; 31.3)  | 28.2 (25.4; 31.1)   | 27.4 (26.0; 28.8) | 18.6 (14.7; 22.5)      | 22.6 (21.1; 24.1)  | 38.7 (36; 41.3)      | 44.8 (39.3; 50.3)   | 58.4 (53.9; 62.8)  | 29.8 (27.7; 31.9)    | 24.6 (19.8; 29.4) | 20.6 (19.4; 21.8)  | 25.2 (20.1; 30.2)           |
| 8. No privacy                                | 18.2 (17.6; 18.7)   | 36.7 (31.9; 41.4)   | 14.1 (11.0; 17.1)  | 19.9 (17.4; 22.5)   | 16.2 (15; 17.3)   | 8.9 (6.0; 11.8)        | 12.0 (10.8; 13.1)  | 22.5 (20.2; 24.8)    | 32.7 (27.5; 37.9)   | 65.9 (61.6; 70.1)  | 17.2 (15.5; 19)      | 21.0 (16.5; 25.6) | 16.0 (14.9; 17.1)  | 19.1 (14.6; 23.7)           |
| 9. Abuses (physical /verbal /emotional)      | 12.5 (12.0; 13.0)   | 21.4 (17.3; 25.4)   | 18.5 (15.1; 21.9)  | 12 (9.9; 14.1)      | 15.3 (14.2; 16.4) | 8.9 (6.0; 11.8)        | 8.2 (7.2; 9.1)     | 22.7 (20.4; 24.9)    | 21.9 (17.3; 26.5)   | 23.4 (19.6; 27.2)  | 11.1 (9.7; 12.5)     | 21.4 (16.8; 25.9) | 7.0 (6.2; 7.7)     | 10.6 (7.0; 14.2)            |
| 10. Informal payment                         | 2.4 (2.2; 2.6)      | 1.3 (0.2; 2.4)      | 6.8 (4.6; 9.1)     | 3.8 (2.6; 5.0)      | 1.6 (1.2; 1.9)    | 8.6 (5.8; 11.5)        | 0.9 (0.6; 1.2)     | 0.8 (0.3; 1.3)       | 19.7 (15.3; 24.1)   | 26.2 (22.2; 30.1)  | 0.7 (0.3; 1.0)       | 0.3 (0.0; 1.0)    | 0.1 (0.0; 0.2)     | 7.8 (4.7; 10.9)             |



### Women with prelabour caesarean section

|                                              | Overall<br>n<br>(%) | Croatia<br>n<br>(%) | France<br>n<br>(%) | Germany<br>n<br>(%) | Italy<br>n<br>(%) | Luxembourg<br>n<br>(%) | Norway<br>n<br>(%) | Portugal<br>n<br>(%) | Romania<br>n<br>(%) | Serbia<br>n<br>(%) | Slovenia<br>n<br>(%) | Spain<br>n<br>(%) | Sweden<br>n<br>(%) | Other countries<br>n<br>(%) |
|----------------------------------------------|---------------------|---------------------|--------------------|---------------------|-------------------|------------------------|--------------------|----------------------|---------------------|--------------------|----------------------|-------------------|--------------------|-----------------------------|
| N                                            | 2964                | 60                  | 47                 | 132                 | 840               | 59                     | 231                | 387                  | 256                 | 152                | 254                  | 38                | 445                | 63                          |
| 1. Consent requested for vaginal examination | 28.9 (27.2; 30.5)   | 66.7 (54.7; 78.6)   | 8.5 (0.5; 16.5)    | 17.4 (11.0; 23.9)   | 38.3 (35.0; 41.6) | 16.9 (7.4; 26.5)       | 6.9 (3.7; 10.2)    | 22.2 (18.1; 26.4)    | 22.7 (17.5; 27.8)   | 69.7 (62.4; 77.0)  | 42.5 (36.4; 48.6)    | 36.8 (21.5; 52.2) | 11.7 (8.7; 14.7)   | 27.0 (16; 37.9)             |
| 2. No information on newborn                 | 28.7 (27.1; 30.4)   | 23.3 (12.6; 34.0)   | 53.2 (38.9; 67.5)  | 14.4 (8.4; 20.4)    | 24.4 (21.5; 27.3) | 16.9 (7.4; 26.5)       | 22.9 (17.5; 28.4)  | 14.2 (10.7; 17.7)    | 44.5 (38.4; 50.6)   | 49.3 (41.4; 57.3)  | 42.9 (36.8; 49.0)    | 21.1 (8.1; 34.0)  | 33.9 (29.5; 38.3)  | 22.2 (12.0; 32.5)           |
| 3. No clear/effective communication from HCP | 35.0 (33.3; 36.7)   | 45.0 (32.4; 57.6)   | 44.7 (30.5; 58.9)  | 22.7 (15.6; 29.9)   | 37.0 (33.8; 40.3) | 10.2 (2.5; 17.9)       | 36.4 (30.2; 42.6)  | 28.7 (24.2; 33.2)    | 40.6 (34.6; 46.6)   | 48.0 (40.1; 56)    | 29.5 (23.9; 35.1)    | 26.3 (12.3; 40.3) | 38.2 (33.7; 42.7)  | 25.4 (14.6; 36.1)           |
| 4. No involvement in choices                 | 43.0 (41.2; 44.8)   | 48.3 (35.7; 61.0)   | 48.9 (34.6; 63.2)  | 27.3 (19.7; 34.9)   | 48.8 (45.4; 52.2) | 16.9 (7.4; 26.5)       | 33.8 (27.7; 39.9)  | 37.0 (32.1; 41.8)    | 43.8 (37.7; 49.8)   | 74.3 (67.4; 81.3)  | 37.0 (31.1; 42.9)    | 36.8 (21.5; 52.2) | 41.6 (37; 46.2)    | 42.9 (30.6; 55.1)           |
| 5. Companionship not allowed                 | 71.5 (69.8; 73.1)   | 93.3 (87; 99.6)     | 59.6 (45.5; 73.6)  | 63.6 (55.4; 71.8)   | 85.5 (83.1; 87.9) | 27.1 (15.8; 38.5)      | 63.2 (57.0; 69.4)  | 52.2 (47.2; 57.2)    | 91.0 (87.5; 94.5)   | 98.0 (95.8; 100)   | 82.7 (78; 87.3)      | 21.1 (8.1; 34)    | 53.3 (48.6; 57.9)  | 49.2 (36.9; 61.6)           |
| 6. Not treated with dignity                  | 30.5 (28.8; 32.2)   | 36.7 (24.5; 48.9)   | 34.0 (20.5; 47.6)  | 22.7 (15.6; 29.9)   | 31.7 (28.5; 34.8) | 15.3 (6.1; 24.4)       | 31.2 (25.2; 37.1)  | 26.4 (22.0; 30.7)    | 35.2 (29.3; 41)     | 55.9 (48.0; 63.8)  | 26 (20.6; 31.4)      | 26.3 (12.3; 40.3) | 27.6 (23.5; 31.8)  | 20.6 (10.6; 30.6)           |
| 7. No emotional support                      | 31.4 (29.8; 33.1)   | 30.0 (18.4; 41.6)   | 44.7 (30.5; 58.9)  | 28.0 (20.4; 35.7)   | 29.6 (26.6; 32.7) | 16.9 (7.4; 26.5)       | 22.1 (16.7; 27.4)  | 30.0 (25.4; 34.5)    | 33.2 (27.4; 39)     | 52.0 (44.0; 59.9)  | 40.2 (34.1; 46.2)    | 42.1 (26.4; 57.8) | 28.5 (24.3; 32.7)  | 33.3 (21.7; 45.0)           |
| 8. No privacy                                | 20.5 (19.0; 21.9)   | 26.7 (15.5; 37.9)   | 12.8 (3.2; 22.3)   | 18.2 (11.6; 24.8)   | 16.9 (14.4; 19.4) | 18.6 (8.7; 28.6)       | 15.2 (10.5; 19.8)  | 15.0 (11.4; 18.5)    | 19.9 (15; 24.8)     | 68.4 (61.0; 75.8)  | 21.7 (16.6; 26.7)    | 21.1 (8.1; 34)    | 19.1 (15.4; 22.8)  | 19.0 (9.4; 28.7)            |
| 9. Abuses (physical /verbal/emotional)       | 14.1 (12.8; 15.3)   | 16.7 (7.2; 26.1)    | 14.9 (4.7; 25.1)   | 15.2 (9.0; 21.3)    | 16.4 (13.9; 18.9) | 8.5 (1.4; 15.6)        | 7.8 (4.3; 11.2)    | 16.8 (13.1; 20.5)    | 14.5 (10.1; 18.8)   | 18.4 (12.3; 24.6)  | 12.2 (8.2; 16.2)     | 15.8 (4.2; 27.4)  | 9.7 (6.9; 12.4)    | 14.3 (5.6; 22.9)            |
| 10. Informal payment                         | 5.2 (4.4; 6.0)      | 5.0 (0.0; 10.5)     | 10.6 (1.8; 19.5)   | 5.3 (1.5; 9.1)      | 1.5 (0.7; 2.4)    | 8.5 (1.4; 15.6)        | 0.9 (0.0; 2.1)     | 0.5 (0.0; 1.2)       | 27.3 (21.9; 32.8)   | 25.0 (18.1; 31.9)  | 0.4 (0.0; 1.2)       | 0.0 (0.0; 0.0)    | 0.0 (0.0; 0.0)     | 12.7 (4.5; 20.9)            |

#### Notes

All the indicators in the domain of experience of care are directly based on WHO standards.

Indicators identified with letters (eg, 2a, 2b) were tailored to take into account different mode of birth (ie, spontaneous vaginal, instrumental vaginal, and caesarean section). These were calculated on subsamples (eg, 2a was calculated on spontaneous vaginal births; 2b was calculated on instrumental vaginal births).

Abbreviations: ECS = emergency caesarean section; HCP = health care provider; IVB= instrumental vaginal birth; SVB = spontaneous vaginal birth

## Supplementary Table 8 Results on availability of physical and human resources

### Women who underwent labour

|                                               | Overall<br>%<br>(95% CI) | Croatia<br>%<br>(95% CI) | France<br>%<br>(95% CI) | Germany<br>%<br>(95% CI) | Italy<br>%<br>(95% CI) | Luxembourg<br>%<br>(95% CI) | Norway<br>%<br>(95% CI) | Portugal<br>%<br>(95% CI) | Romania<br>%<br>(95% CI) | Serbia<br>%<br>(95% CI) | Slovenia<br>%<br>(95% CI) | Spain<br>%<br>(95% CI) | Sweden<br>%<br>(95% CI) | Other<br>countries<br>%<br>(95% CI) |
|-----------------------------------------------|--------------------------|--------------------------|-------------------------|--------------------------|------------------------|-----------------------------|-------------------------|---------------------------|--------------------------|-------------------------|---------------------------|------------------------|-------------------------|-------------------------------------|
| N                                             | 18063                    | 398                      | 497                     | 949                      | 3973                   | 382                         | 2989                    | 1298                      | 315                      | 478                     | 1838                      | 309                    | 4355                    | 282                                 |
| 1. No timely care by HCPs at facility arrival | 13.1 (12.6; 13.6)        | 11.1 (8; 14.1)           | 13.3 (10.3; 16.3)       | 15.9 (13.6; 18.2)        | 12.5 (11.5; 13.5)      | 10.2 (7.2; 13.2)            | 14.2 (12.9; 15.4)       | 13.4 (11.6; 15.3)         | 19.7 (15.3; 24.1)        | 32.2 (28.0; 36.4)       | 11.8 (10.3; 13.3)         | 11.7 (8.1; 15.2)       | 10.5 (9.6; 11.5)        | 13.1 (9.2; 17.1)                    |
| 2. No information on maternal danger signs    | 45.3 (44.6; 46)          | 58.5 (53.7; 63.4)        | 44.5 (40.1; 48.8)       | 36.8 (33.7; 39.8)        | 44.8 (43.3; 46.4)      | 29.3 (24.8; 33.9)           | 43.3 (41.5; 45.1)       | 28.7 (26.3; 31.2)         | 47.6 (42.1; 53.1)        | 75.1 (71.2; 79.0)       | 42.2 (40.0; 44.5)         | 36.2 (30.9; 41.6)      | 53.1 (51.6; 54.6)       | 37.9 (32.3; 43.6)                   |
| 3. No information on newborn danger signs     | 55 (54.2; 55.7)          | 55.8 (50.9; 60.7)        | 51.1 (46.7; 55.5)       | 47.5 (44.3; 50.7)        | 50.7 (49.1; 52.2)      | 41.9 (36.9; 46.8)           | 54.8 (53.1; 56.6)       | 45.2 (42.5; 47.9)         | 54.6 (49.1; 60.1)        | 75.9 (72.1; 79.8)       | 49.4 (47.1; 51.7)         | 58.6 (53.1; 64.1)      | 65.5 (64.1; 66.9)       | 44 (38.2; 49.8)                     |
| 4. Inadequate room comfort and equipment      | 8.3 (7.9; 8.7)           | 12.8 (9.5; 16.1)         | 8.2 (5.8; 10.7)         | 3.1 (2.0; 4.2)           | 9.9 (9.0; 10.9)        | 0.0 (0.0; 0.0)              | 9.2 (8.2; 10.3)         | 4.5 (3.3; 5.6)            | 9.8 (6.6; 13.1)          | 27.8 (23.8; 31.8)       | 7.5 (6.3; 8.7)            | 7.8 (4.8; 10.8)        | 7.2 (6.4; 7.9)          | 6.4 (3.5; 9.2)                      |
| 5. Inadequate number of women per rooms       | 8.7 (8.3; 9.2)           | 9.5 (6.7; 12.4)          | 2.8 (1.4; 4.3)          | 4.8 (3.5; 6.2)           | 9.1 (8.2; 10.0)        | 4.5 (2.4; 6.5)              | 9.5 (8.4; 10.5)         | 6.4 (5.1; 7.7)            | 7.9 (5.0; 10.9)          | 18.4 (14.9; 21.9)       | 7.5 (6.3; 8.7)            | 11 (7.5; 14.5)         | 9.9 (9.0; 10.8)         | 6.7 (3.8; 9.7)                      |
| 6. Inadequate room cleaning                   | 6.7 (6.3; 7)             | 12.1 (8.9; 15.3)         | 3.8 (2.1; 5.5)          | 4.7 (3.4; 6.1)           | 7.3 (6.5; 8.1)         | 1 (0; 2.1)                  | 8.9 (7.9; 10.0)         | 3.5 (2.5; 4.5)            | 8.9 (5.7; 12)            | 24.1 (20.2; 27.9)       | 2.2 (1.6; 2.9)            | 2.6 (0.8; 4.4)         | 6.4 (5.6; 7.1)          | 5 (2.4; 7.5)                        |
| 7. Inadequate bathroom                        | 13.4 (12.9; 13.9)        | 24.4 (20.2; 28.6)        | 4 (2.3; 5.8)            | 7.3 (5.6; 8.9)           | 14.5 (13.4; 15.6)      | 1.8 (0.5; 3.2)              | 11.9 (10.7; 13.0)       | 14.9 (12.9; 16.8)         | 16.5 (12.4; 20.6)        | 48.7 (44.3; 53.2)       | 14.2 (12.6; 15.8)         | 12 (8.4; 15.6)         | 11.3 (10.4; 12.3)       | 9.2 (5.8; 12.6)                     |
| 8. Inadequate partner visiting hours          | 61.6 (60.9; 62.3)        | 91 (88.1; 93.8)          | 46.3 (41.9; 50.7)       | 49.9 (46.8; 53.1)        | 65.8 (64.4; 67.3)      | 23.0 (18.8; 27.3)           | 60.2 (58.4; 61.9)       | 66.6 (64.0; 69.1)         | 83.5 (79.4; 87.6)        | 89.3 (86.6; 92.1)       | 80.4 (78.5; 82.2)         | 6.1 (3.5; 8.8)         | 55.5 (54.1; 57.0)       | 33.7 (28.2; 39.2)                   |
| 9. Inadequate HCP's number                    | 21 (20.4; 21.6)          | 36.4 (31.7; 41.2)        | 20.3 (16.8; 23.9)       | 13.4 (11.2; 15.5)        | 17.8 (16.7; 19.0)      | 7.3 (4.7; 9.9)              | 29.5 (27.9; 31.1)       | 13 (11.2; 14.9)           | 19.4 (15.0; 23.7)        | 40.8 (36.4; 45.2)       | 10.6 (9.2; 12.0)          | 9.7 (6.4; 13.0)        | 25.6 (24.3; 26.9)       | 15.6 (11.4; 19.8)                   |
| 10. Inadequate HCP professionalism            | 5.5 (5.2; 5.9)           | 9.8 (6.9; 12.7)          | 6.6 (4.5; 8.8)          | 4.4 (3.1; 5.7)           | 5.4 (4.7; 6.1)         | 1.3 (0.2; 2.4)              | 4.4 (3.7; 5.2)          | 5.5 (4.2; 6.7)            | 9.5 (6.3; 12.8)          | 19.2 (15.7; 22.8)       | 4.4 (3.4; 5.3)            | 6.8 (4.0; 9.6)         | 5.2 (4.6; 5.9)          | 3.5 (1.4; 5.7)                      |

### Women with prelabour caesarean section

|                                            | Overall<br>%<br>(95% CI) | Croatia<br>%<br>(95% CI) | France<br>%<br>(95% CI) | Germany<br>%<br>(95% CI) | Italy<br>%<br>(95%<br>CI) | Luxembourg<br>%<br>(95% CI) | Norway<br>%<br>(95% CI) | Portugal<br>%<br>(95% CI) | Romania<br>%<br>(95% CI) | Serbia<br>%<br>(95% CI) | Slovenia<br>%<br>(95% CI) | Spain<br>%<br>(95% CI) | Sweden<br>%<br>(95% CI) | Other countries<br>%<br>(95% CI) |
|--------------------------------------------|--------------------------|--------------------------|-------------------------|--------------------------|---------------------------|-----------------------------|-------------------------|---------------------------|--------------------------|-------------------------|---------------------------|------------------------|-------------------------|----------------------------------|
| N                                          | 2964                     | 60                       | 47                      | 132                      | 840                       | 59                          | 231                     | 387                       | 256                      | 152                     | 254                       | 38                     | 445                     | 63                               |
| 1. No information on maternal danger signs | 45.5 (43.8; 47.3)        | 53.3 (40.7; 66)          | 51.1 (36.8; 65.4)       | 34.1 (26.0; 42.2)        | 48.3 (45.0; 51.7)         | 28.8 (17.3; 40.4)           | 39.4 (33.1; 45.7)       | 28.4 (23.9; 32.9)         | 44.5 (38.4; 50.6)        | 69.1 (61.7; 76.4)       | 44.9 (38.8; 51.0)         | 36.8 (21.5; 52.2)      | 56.6 (52.0; 61.2)       | 41.3 (29.1; 53.4)                |
| 2. No information on newborn danger signs  | 52.4 (50.6; 54.2)        | 63.3 (51.1; 75.5)        | 57.4 (43.3; 71.6)       | 48.5 (40.0; 57.0)        | 51.8 (48.4; 55.2)         | 37.3 (24.9; 49.6)           | 49.4 (42.9; 55.8)       | 39.8 (34.9; 44.7)         | 47.7 (41.5; 53.8)        | 69.7 (62.4; 77.0)       | 51.6 (45.4; 57.7)         | 47.4 (31.5; 63.2)      | 66.7 (62.4; 71.1)       | 39.7 (27.6; 51.8)                |
| 3. Inadequate room comfort and equipment   | 10.8 (9.7; 11.9)         | 26.7 (15.5; 37.9)        | 8.5 (0.5; 16.5)         | 6.1 (2; 10.1)            | 12.5 (10.3; 14.7)         | 0 (0.0; 0.0)                | 8.7 (5.0; 12.3)         | 5.2 (3; 7.4)              | 10.2 (6.5; 13.9)         | 25.7 (18.7; 32.6)       | 5.9 (3.0; 8.8)            | 7.9 (0.7; 16.5)        | 13.7 (10.5; 16.9)       | 4.8 (0.0; 10)                    |
| 4. Inadequate number of women per rooms    | 7 (6.0; 7.9)             | 15 (6.0; 24)             | 0 (0.0; 0.0)            | 3.8 (0.5; 7.0)           | 6.2 (4.6; 7.8)            | 5.1 (0.0; 10.7)             | 12.1 (7.9; 16.3)        | 5.9 (3.6; 8.3)            | 9 (5.5; 12.5)            | 12.5 (7.2; 17.8)        | 5.1 (2.4; 7.8)            | 13.2 (2.4; 23.9)       | 4.9 (2.9; 7.0)          | 6.3 (0.3; 12.4)                  |
| 5. Inadequate room cleaning                | 8.3 (7.3; 9.3)           | 16.7 (7.2; 26.1)         | 2.1 (0.0; 6.3)          | 7.6 (3.1; 12.1)          | 7 (5.3; 8.8)              | 1.7 (0.0; 5.0)              | 10 (6.1; 13.8)          | 4.4 (2.4; 6.4)            | 11.3 (7.4; 15.2)         | 27.6 (20.5; 34.7)       | 3.1 (1.0; 5.3)            | 5.3 (1.8; 12.4)        | 8.8 (6.1; 11.4)         | 6.3 (0.3; 12.4)                  |
| 6. Inadequate bathroom                     | 14.4 (13.1; 15.7)        | 35 (22.9; 47.1)          | 2.1 (0.0; 6.3)          | 5.3 (1.5; 9.1)           | 14.5 (12.1; 16.9)         | 0 (0.0; 0.0)                | 14.7 (10.1; 19.3)       | 12.1 (8.9; 15.4)          | 19.5 (14.7; 24.4)        | 37.5 (29.8; 45.2)       | 9.4 (5.9; 13)             | 15.8 (4.2; 27.4)       | 11.5 (8.5; 14.4)        | 11.1 (3.4; 18.9)                 |
| 7. Inadequate partner visiting hours       | 66.4 (64.7; 68.1)        | 88.3 (80.2; 96.5)        | 61.7 (47.8; 75.6)       | 50 (41.5; 58.5)          | 70.5 (67.4; 73.6)         | 22 (11.5; 32.6)             | 61.5 (55.2; 67.7)       | 55.8 (50.9; 60.8)         | 81.6 (76.9; 86.4)        | 92.1 (87.8; 96.4)       | 84.3 (79.8; 88.7)         | 13.2 (2.4; 23.9)       | 58.7 (54.1; 63.2)       | 46 (33.7; 58.3)                  |
| 8. Inadequate HCP's number                 | 21.3 (19.8; 22.8)        | 40 (27.6; 52.4)          | 21.3 (9.6; 33.0)        | 18.2 (11.6; 24.8)        | 20.6 (17.9; 23.3)         | 10.2 (2.5; 17.9)            | 29.9 (24.0; 35.8)       | 12.4 (9.1; 15.7)          | 18.8 (14.0; 23.5)        | 39.5 (31.7; 47.2)       | 11 (7.2; 14.9)            | 18.4 (6.1; 30.7)       | 27.4 (23.3; 31.6)       | 19 (9.4; 28.7)                   |
| 9. Inadequate HCP professionalism          | 6.4 (5.6; 7.3)           | 8.3 (1.3; 15.3)          | 4.3 (0.0; 10)           | 4.5 (1.0; 8.1)           | 6.2 (4.6; 7.8)            | 1.7 (0.0; 5.0)              | 6.5 (3.3; 9.7)          | 4.1 (2.2; 6.1)            | 12.5 (8.4; 16.6)         | 12.5 (7.2; 17.8)        | 4.3 (1.8; 6.8)            | 5.3 (1.8; 12.4)        | 6.1 (3.8; 8.3)          | 4.8 (0.0; 10)                    |
| 10. Inadequate wards reorganization        | 40.9 (39.1; 42.6)        | 63.3 (51.1; 75.5)        | 29.8 (16.7; 42.9)       | 33.3 (25.3; 41.4)        | 45.7 (42.3; 49.1)         | 16.9 (7.4; 26.5)            | 36.8 (30.6; 43)         | 31.3 (26.6; 35.9)         | 35.5 (29.7; 41.4)        | 69.1 (61.7; 76.4)       | 27.6 (22.1; 33.1)         | 34.2 (19.1; 49.3)      | 47.9 (43.2; 52.5)       | 36.5 (24.6; 48.4)                |

#### Notes

All the indicators in the domain of resources are directly based on WHO standards

Abbreviations: HCP = health care provider

## Supplementary Table 9 Results on reorganizational changes due to COVID-19

### Women who underwent labour

|                                                                | Overall<br>%<br>(95% CI) | Croatia<br>%<br>(95% CI) | France<br>%<br>(95% CI) | Germany<br>%<br>(95% CI) | Italy<br>%<br>(95% CI) | Luxembourg<br>%<br>(95% CI) | Norway<br>%<br>(95% CI) | Portugal<br>%<br>(95% CI) | Romania<br>%<br>(95% CI) | Serbia<br>%<br>(95% CI) | Slovenia<br>%<br>(95% CI) | Spain<br>%<br>(95% CI) | Sweden<br>%<br>(95% CI) | Other countries<br>%<br>(95% CI) |
|----------------------------------------------------------------|--------------------------|--------------------------|-------------------------|--------------------------|------------------------|-----------------------------|-------------------------|---------------------------|--------------------------|-------------------------|---------------------------|------------------------|-------------------------|----------------------------------|
| N                                                              | 18063                    | 398                      | 497                     | 949                      | 3973                   | 382                         | 2989                    | 1298                      | 315                      | 478                     | 1838                      | 309                    | 4355                    | 282                              |
| 1. Difficulties in attending routine antenatal visits          | 41·8 (41·1; 42·6)        | 43·2 (38·3; 48·1)        | 42·9 (38·5; 47·2)       | 26·1 (23·3; 28·9)        | 44·7 (43·1; 46·2)      | 36·6 (31·8; 41·5)           | 46·1 (44·3; 47·9)       | 49·2 (46·5; 51·9)         | 63·5 (58·2; 68·8)        | 63·0 (58·6; 67·3)       | 45·8 (43·5; 48)           | 62·8 (57·4; 68·2)      | 30·8 (29·5; 32·2)       | 40·1 (34·4; 45·8)                |
| 2. Any barriers in accessing the facility                      | 31·4 (30·7; 32·1)        | 37·7 (32·9; 42·4)        | 24·1 (20·4; 27·9)       | 31·3 (28·3; 34·2)        | 31·9 (30·4; 33·3)      | 29·8 (25·3; 34·4)           | 33·7 (32; 35·4)         | 32·6 (30; 35·1)           | 42·2 (36·8; 47·7)        | 50·0 (45·5; 54·5)       | 29·4 (27·4; 31·5)         | 31·1 (25·9; 36·2)      | 27·5 (26·2; 28·8)       | 30·1 (24·8; 35·5)                |
| 3. Inadequate info graphics                                    | 5·5 (5·2; 5·9)           | 9·8 (6·9; 12·7)          | 6·6 (4·5; 8·8)          | 4·4 (3·1; 5·7)           | 5·4 (4·7; 6·1)         | 1·3 (0·2; 2·4)              | 4·4 (3·7; 5·2)          | 5·5 (4·2; 6·7)            | 9·5 (6·3; 12·8)          | 19·2 (15·7; 22·8)       | 4·4 (3·4; 5·3)            | 6·8 (4·0; 9·6)         | 5·2 (4·6; 5·9)          | 3·5 (1·4; 5·7)                   |
| 4. Inadequate wards reorganization                             | 37·1 (36·4; 37·9)        | 58·3 (53·4; 63·1)        | 28·2 (24·2; 32·1)       | 30·2 (27·3; 33·2)        | 41·0 (39·5; 42·6)      | 16·5 (12·8; 20·2)           | 31·9 (30·2; 33·6)       | 37·4 (34·8; 40·1)         | 39·4 (34; 44·8)          | 70·5 (66·4; 74·6)       | 28·3 (26·3; 30·4)         | 35·6 (30·3; 40·9)      | 40 (38·6; 41·5)         | 29·4 (24·1; 34·8)                |
| 5. Inadequate room reorganization                              | 37·9 (37·2; 38·6)        | 60·6 (55·8; 65·4)        | 17·1 (13·8; 20·4)       | 41·5 (38·4; 44·7)        | 47 (45·4; 48·5)        | 20·4 (16·4; 24·5)           | 27·8 (26·2; 29·4)       | 39·6 (36·9; 42·3)         | 38·7 (33·4; 44·1)        | 72·4 (68·4; 76·4)       | 42·7 (40·4; 45·0)         | 27·5 (22·5; 32·5)      | 32·6 (31·2; 34·0)       | 29·1 (23·8; 34·4)                |
| 6. Lacking one functioning accessible hand-washing station     | 13·6 (13·1; 14·1)        | 20·6 (16·6; 24·6)        | 10·5 (7·8; 13·2)        | 7·3 (5·6; 8·9)           | 34·7 (33·2; 36·2)      | 4·7 (2·6; 6·8)              | 5·8 (4·9; 6·6)          | 9·6 (8·0; 11·2)           | 17·5 (13·3; 21·7)        | 35·6 (31·3; 39·9)       | 3·4 (2·6; 4·3)            | 11·7 (8·1; 15·2)       | 4·6 (4·0; 5·3)          | 11·3 (7·6; 15)                   |
| 7. HCP not always using PPEs                                   | 34·4 (33·7; 35·1)        | 42·2 (37·4; 47·1)        | 8·5 (6·0; 10·9)         | 21·1 (18·5; 23·7)        | 9·5 (8·6; 10·4)        | 5·2 (3·0; 7·5)              | 60·6 (58·8; 62·3)       | 11·3 (9·6; 13)            | 13·3 (9·6; 17·1)         | 34·5 (30·3; 38·8)       | 17·6 (15·8; 19·3)         | 12·0 (8·4; 15·6)       | 64·8 (63·3; 66·2)       | 23·4 (18·5; 28·3)                |
| 8. Insufficient HCP number                                     | 31·8 (31·1; 32·5)        | 50·5 (45·6; 55·4)        | 28·4 (24·4; 32·3)       | 24·9 (22·1; 27·6)        | 29·9 (28·5; 31·3)      | 20·7 (16·6; 24·7)           | 34·6 (32·9; 36·3)       | 27·5 (25·1; 29·9)         | 30·2 (25·1; 35·2)        | 53·1 (48·7; 57·6)       | 21·3 (19·5; 23·2)         | 17·8 (13·5; 22·1)      | 37·7 (36·3; 39·2)       | 22·3 (17·5; 27·2)                |
| 9. Communication inadequate to contain COVID-19 related stress | 38·1 (37·4; 38·8)        | 59·5 (54·7; 64·4)        | 43·7 (39·3; 48)         | 32·6 (29·6; 35·5)        | 38·7 (37·2; 40·2)      | 24·9 (20·5; 29·2)           | 34·8 (33·1; 36·5)       | 37·2 (34·6; 39·8)         | 47·3 (41·8; 52·8)        | 55·9 (51·4; 60·3)       | 33·7 (31·5; 35·8)         | 29·8 (24·7; 34·9)      | 40·4 (39; 41·9)         | 28·7 (23·4; 34)                  |
| 10. Reduction in QMNC due to COVID-19                          | 49·9 (49·1; 50·6)        | 45·7 (40·8; 50·6)        | 37·2 (33·0; 41·5)       | 45·8 (42·7; 49·0)        | 44 (42·4; 45·5)        | 38·5 (33·6; 43·4)           | 66 (64·3; 67·7)         | 47·3 (44·6; 50·0)         | 58·1 (52·6; 63·5)        | 60·7 (56·3; 65·0)       | 48·2 (45·9; 50·4)         | 51·8 (46·2; 57·4)      | 48·3 (46·9; 49·8)       | 35·8 (30·2; 41·4)                |

## Women with prelabour caesarean section

|                                                                | Overall<br>%<br>(95% CI) | Croatia<br>%<br>(95% CI) | France<br>%<br>(95% CI) | Germany<br>%<br>(95% CI) | Italy<br>%<br>(95% CI) | Luxembourg<br>%<br>(95% CI) | Norway<br>%<br>(95% CI) | Portugal<br>%<br>(95% CI) | Romania<br>%<br>(95% CI) | Serbia<br>%<br>(95% CI) | Slovenia<br>%<br>(95% CI) | Spain<br>%<br>(95%<br>CI) | Sweden<br>%<br>(95% CI) | Other countries<br>%<br>(95% CI) |
|----------------------------------------------------------------|--------------------------|--------------------------|-------------------------|--------------------------|------------------------|-----------------------------|-------------------------|---------------------------|--------------------------|-------------------------|---------------------------|---------------------------|-------------------------|----------------------------------|
| N                                                              | 2964                     | 60                       | 47                      | 132                      | 840                    | 59                          | 231                     | 387                       | 256                      | 152                     | 254                       | 38                        | 445                     | 63                               |
| 1. Difficulties in attending routine antenatal visits          | 43.7 (41.9; 45.5)        | 41.7 (29.2; 54.1)        | 42.6 (28.4; 56.7)       | 33.3 (25.3; 41.4)        | 44.2 (40.8; 47.5)      | 33.9 (21.8; 46.0)           | 45.5 (39.0; 51.9)       | 43.4 (38.5; 48.3)         | 51.6 (45.4; 57.7)        | 64.5 (56.9; 72.1)       | 41.3 (35.3; 47.4)         | 47.4 (31.5; 63.2)         | 36.2 (31.7; 40.6)       | 44.4 (32.2; 56.7)                |
| 2. Any barriers in accessing the facility                      | 35.1 (33.3; 36.8)        | 33.3 (21.4; 45.3)        | 25.5 (13.1; 38.0)       | 43.2 (34.7; 51.6)        | 30.2 (27.1; 33.3)      | 33.9 (21.8; 46.0)           | 39 (32.7; 45.2)         | 32.8 (28.1; 37.5)         | 38.3 (32.3; 44.2)        | 53.3 (45.4; 61.2)       | 33.5 (27.7; 39.3)         | 26.3 (12.3; 40.3)         | 36.2 (31.7; 40.6)       | 38.1 (26.1; 50.1)                |
| 3. Inadequate info graphics                                    | 6.4 (5.6; 7.3)           | 8.3 (1.3; 15.3)          | 4.3 (0.0; 10)           | 4.5 (1.0; 8.1)           | 6.2 (4.6; 7.8)         | 1.7 (0.0; 5.0)              | 6.5 (3.3; 9.7)          | 4.1 (2.2; 6.1)            | 12.5 (8.4; 16.6)         | 12.5 (7.2; 17.8)        | 4.3 (1.8; 6.8)            | 5.3 (0.0; 12.4)           | 6.1 (3.8; 8.3)          | 4.8 (0.0; 10.0)                  |
| 4. Inadequate wards reorganization                             | 40.9 (39.1; 42.6)        | 63.3 (51.1; 75.5)        | 29.8 (16.7; 42.9)       | 33.3 (25.3; 41.4)        | 45.7 (42.3; 49.1)      | 16.9 (7.4; 26.5)            | 36.8 (30.6; 43)         | 31.3 (26.6; 35.9)         | 35.5 (29.7; 41.4)        | 69.1 (61.7; 76.4)       | 27.6 (22.1; 33.1)         | 34.2 (19.1; 49.3)         | 47.9 (43.2; 52.5)       | 36.5 (24.6; 48.4)                |
| 5. Inadequate room reorganization                              | 39.8 (38.0; 41.6)        | 65.0 (52.9; 77.1)        | 19.1 (7.9; 30.4)        | 40.9 (32.5; 49.3)        | 49.2 (45.8; 52.5)      | 13.6 (4.8; 22.3)            | 30.3 (24.4; 36.2)       | 28.7 (24.2; 33.2)         | 37.5 (31.6; 43.4)        | 65.1 (57.6; 72.7)       | 42.5 (36.4; 48.6)         | 28.9 (14.5; 43.4)         | 31.5 (27.1; 35.8)       | 34.9 (23.1; 46.7)                |
| 6. Lacking one functioning accessible hand-washing station     | 19.1 (17.6; 20.5)        | 18.3 (8.5; 28.1)         | 6.4 (0.0; 13.4)         | 5.3 (1.5; 9.1)           | 39.8 (36.5; 43.1)      | 5.1 (0.0; 10.7)             | 6.1 (3.0; 9.1)          | 10.1 (7.1; 13.1)          | 17.2 (12.6; 21.8)        | 38.2 (30.4; 45.9)       | 4.7 (2.1; 7.3)            | 15.8 (4.2; 27.4)          | 5.4 (3.3; 7.5)          | 15.9 (6.8; 24.9)                 |
| 7. HCP not always using PPEs                                   | 28.2 (26.6; 29.8)        | 36.7 (24.5; 48.9)        | 8.5 (0.5; 16.5)         | 36.4 (28.2; 44.6)        | 12.4 (10.2; 14.6)      | 1.7 (0.0; 5.0)              | 63.2 (57; 69.4)         | 10.9 (7.8; 14.0)          | 16.8 (12.2; 21.4)        | 32.9 (25.4; 40.4)       | 18.5 (13.7; 23.3)         | 10.5 (0.8; 20.3)          | 69.9 (65.6; 74.1)       | 20.6 (10.6; 30.6)                |
| 8. Insufficient HCP number                                     | 34.4 (32.7; 36.1)        | 45.0 (32.4; 57.6)        | 25.5 (13.1; 38)         | 34.1 (26; 42.2)          | 34.0 (30.8; 37.3)      | 16.9 (7.4; 26.5)            | 39.8 (33.5; 46.1)       | 28.4 (23.9; 32.9)         | 32.0 (26.3; 37.7)        | 43.4 (35.5; 51.3)       | 28.0 (22.4; 33.5)         | 13.2 (2.4; 23.9)          | 43.1 (38.5; 47.7)       | 33.3 (21.7; 45.0)                |
| 9. Communication inadequate to contain COVID-19 related stress | 42.6 (40.8; 44.4)        | 58.3 (45.9; 70.8)        | 44.7 (30.5; 58.9)       | 39.4 (31.1; 47.7)        | 44.5 (41.2; 47.9)      | 25.4 (14.3; 36.5)           | 42.4 (36.1; 48.8)       | 32.8 (28.1; 37.5)         | 37.9 (31.9; 43.8)        | 55.9 (48; 63.8)         | 37.8 (31.8; 43.8)         | 23.7 (10.2; 37.2)         | 50.8 (46.1; 55.4)       | 44.4 (32.2; 56.7)                |
| 10. Reduction in QMNC due to COVID-19                          | 50.2 (48.4; 52.0)        | 45 (32.4; 57.6)          | 44.7 (30.5; 58.9)       | 43.9 (35.5; 52.4)        | 47.4 (44; 50.8)        | 42.4 (29.8; 55.0)           | 68.4 (62.4; 74.4)       | 45.5 (40.5; 50.4)         | 50.0 (43.9; 56.1)        | 57.2 (49.4; 65.1)       | 50.4 (44.2; 56.5)         | 52.6 (36.8; 68.5)         | 53.5 (48.8; 58.1)       | 38.1 (26.1; 50.1)                |

### Notes

Indicator 6 was defined as: at least one functioning and accessible hand-washing station (near or inside the room where the mother was hospitalised) supplied with water and soap or with disinfectant alcohol solution.

Abbreviations: HCP = health care provider; PPE = personal protective equipment; QMNC = quality of maternal and newborn care.

**Supplementary Table 10 Comparison of the 40 key quality measures between women who underwent labour (N=18063) and women who did not (N=2964)**

| Provision of care                              | OR (95% CI)       | p value | Experience of care                           | OR (95% CI)       | p value | Availability of physical and human resources  | OR (95% CI)       | p value | Reorganizational changes due to COVID-19                        | OR (95% CI)       | p value |
|------------------------------------------------|-------------------|---------|----------------------------------------------|-------------------|---------|-----------------------------------------------|-------------------|---------|-----------------------------------------------------------------|-------------------|---------|
| 1. No pain relief during labour                | NA                | NA      | 1. No freedom of movements during labour     | NA                | NA      | 1. No timely care by HCPs at facility arrival | 1.03 (0.90; 1.18) | 0.648   | 1. Difficulties in attending routine antenatal visits           | 0.98 (0.90; 10.7) | 0.728   |
| 2. Mode of birth                               |                   |         | 2a. No choice of birth position (in SVB)     | NA                | NA      | 2. No information on maternal danger signs    | 1.01 (0.92; 1.11) | 0.753   | 2. Any barriers in accessing the facility                       | 1.08 (0.98; 1.19) | 0.119   |
| 2a. IVB                                        | NA                | NA      |                                              |                   |         |                                               |                   |         |                                                                 |                   |         |
| 2b. ECS during labour                          | NA                | NA      |                                              |                   |         |                                               |                   |         |                                                                 |                   |         |
| 3a. Episiotomy (in SVB)                        | NA                | NA      | 2b. No consent requested (for IVB)           | NA                | NA      | 3. No information on newborn danger signs     | 0.97 (0.88; 1.07) | 0.554   | 3. Inadequate info graphics                                     | 1.02 (0.92; 1.12) | 0.711   |
| 3b. Fundal pressure (in IVB)                   | NA                | NA      | 2c. No information on newborn (in ECS)       | 0.61 (0.53; 0.70) | <0.001  | 4. Inadequate room comfort and equipment      | 1.14 (0.98; 1.33) | 0.088   | 4. Inadequate wards reorganization                              | 1.07 (0.98; 1.18) | 0.120   |
| 3c. No pain relief after CS                    | 0.91 (0.76; 1.10) | 0.339   | 3. No clear/effective communication from HCP | 1.06 (0.96; 1.17) | 0.270   | 5. Inadequate number of women per rooms       | 0.81 (0.67; 0.96) | 0.015   | 5. Inadequate room reorganization                               | 0.95 (0.86; 1.04) | 0.253   |
| 4. No skin to skin                             | 3.39 (3.02; 3.81) | <0.001  | 4. No involvement in choices                 | 1.07 (0.98; 1.18) | 0.141   | 6. Inadequate room cleaning                   | 1.15 (0.97; 1.37) | 0.114   | 6. Lacking one functioning accessible hand; washing station     | 1.01 (0.89; 1.15) | 0.903   |
| 5. No early breastfeeding                      | 2.95 (2.63; 3.30) | <0.001  | 5. Companionship not allowed                 | 1.25 (1.13; 1.39) | <0.001  | 7. Inadequate bathroom                        | 0.89 (0.78; 1.01) | 0.080   | 7. HCP not always using PPEs                                    | 1.17 (1.04; 1.31) | 0.008   |
| 6. Inadequate breastfeeding support            | 1.13 (1.02; 1.24) | 0.016   | 6. Not treated with dignity                  | 1.11 (1.00; 1.23) | 0.044   | 8. Inadequate partner visiting hours          | 1.11 (1.01; 1.23) | 0.035   | 8. Insufficient HCP number                                      | 1.27 (1.02; 1.24) | 0.015   |
| 7. No rooming-in                               | 1.68 (1.50; 1.89) | <0.001  | 7. No emotional support                      | 0.88 (0.80; 0.98) | 0.017   | 9. Inadequate HCP's number                    | 1.05 (0.94; 1.18) | 0.402   | 9. Communication inadequate to contain COVID; 19 related stress | 1.12 (1.02; 1.23) | 0.014   |
| 8. Not allowed to stay with the baby as wished | 1.35 (1.15; 1.58) | <0.001  | 8. No privacy                                | 0.84 (0.75; 0.95) | 0.005   | 10. Inadequate HCP professionalism            | 0.88 (0.73; 1.07) | 0.211   | 10. Reduction in QMNC due to COVID; 19                          | 1.01 (0.94; 1.09) | 0.748   |
| 9. No                                          | 1.76              | <0.001  | 9. Abuses                                    | 0.86              | 0.031   |                                               |                   |         |                                                                 |                   |         |

|                                        |                   |              |                               |                   |       |
|----------------------------------------|-------------------|--------------|-------------------------------|-------------------|-------|
| exclusive breastfeeding at discharge   | (1.60; 1.94)      |              | (physical /verbal /emotional) | (0.76; 0.98)      |       |
| 10. No immediate attention when needed | 1.11 (1.01; 1.22) | <b>0.034</b> | 10. Informal payment          | 1.23 (0.91; 1.58) | 0.091 |

---

Notes

OR are calculated taking women who underwent labour as reference and adjusting for all socio-demographic variables, type of professionals assisting the woman, newborn admission in neonatal intensive or semi-intensive care unit, mother admission in intensive care unit and multiple birth.

All the indicators in the domains of provision of care, experience of care, and resources are directly based on WHO standards.

Indicators identified with letters (eg, 3a, 3b) were tailored to take into account different mode of birth (ie, spontaneous vaginal, instrumental vaginal, and caesarean section). These were calculated on subsamples (eg, 3a was calculated on spontaneous vaginal births; 3b was calculated on instrumental vaginal births).

Indicator 6 in the domains of reorganizational changes due to COVID-19 was defined as: at least one functioning and accessible hand-washing station (near or inside the room where the mother was hospitalised) supplied with water and soap or with disinfectant alcohol solution.

Abbreviations: CS = caesarean section; ECS = emergency caesarean section; HCP = health care provider; IVB = instrumental vaginal birth; PPE = personal protective equipment; QMNC = quality maternal and newborn care; SVB = spontaneous vaginal birth

**Supplementary Table 11 QMNC Index by country**

| <b>Country</b>      | <b>n</b>     | <b>QMNC Index<br/>Median (IQR; min-max)</b> | <b>p value*</b> |
|---------------------|--------------|---------------------------------------------|-----------------|
| Luxembourg          | 351          | 355 (335-375; 155-400)                      | <0·001          |
| Spain               | 286          | 345 (305-370; 135-400)                      | <0·001          |
| Germany             | 798          | 335 (295-360; 95-400)                       | <0·001          |
| France              | 405          | 330 (290-360; 130-400)                      | 0·001           |
| Norway              | 1588         | 330 (285-360; 90-400)                       | <0·001          |
| Sweden              | 3779         | 325 (285-355; 55-400)                       | 0·003           |
| Portugal            | 1271         | 320 (275-355; 90-400)                       | 0·181           |
| Slovenia            | 1711         | 320 (280-350; 45-400)                       | 0·240           |
| Italy               | 3730         | 315 (260-350; 55-400)                       | <0·001          |
| Romania             | 406          | 275 (220-315; 65-385)                       | <0·001          |
| Croatia             | 346          | 270 (230-305; 105-380)                      | <0·001          |
| Serbia              | 468          | 205 (160-262.5; 50-375)                     | <0·001          |
| <b>Total sample</b> | <b>15139</b> | <b>320 (270-355; 45-400)</b>                |                 |

Notes: \*Comparison between total median and country median;

Abbreviation: IQR = interquartile range; QMNC = quality maternal and newborn care



**Supplementary Figure 2 QMNC Index by country**

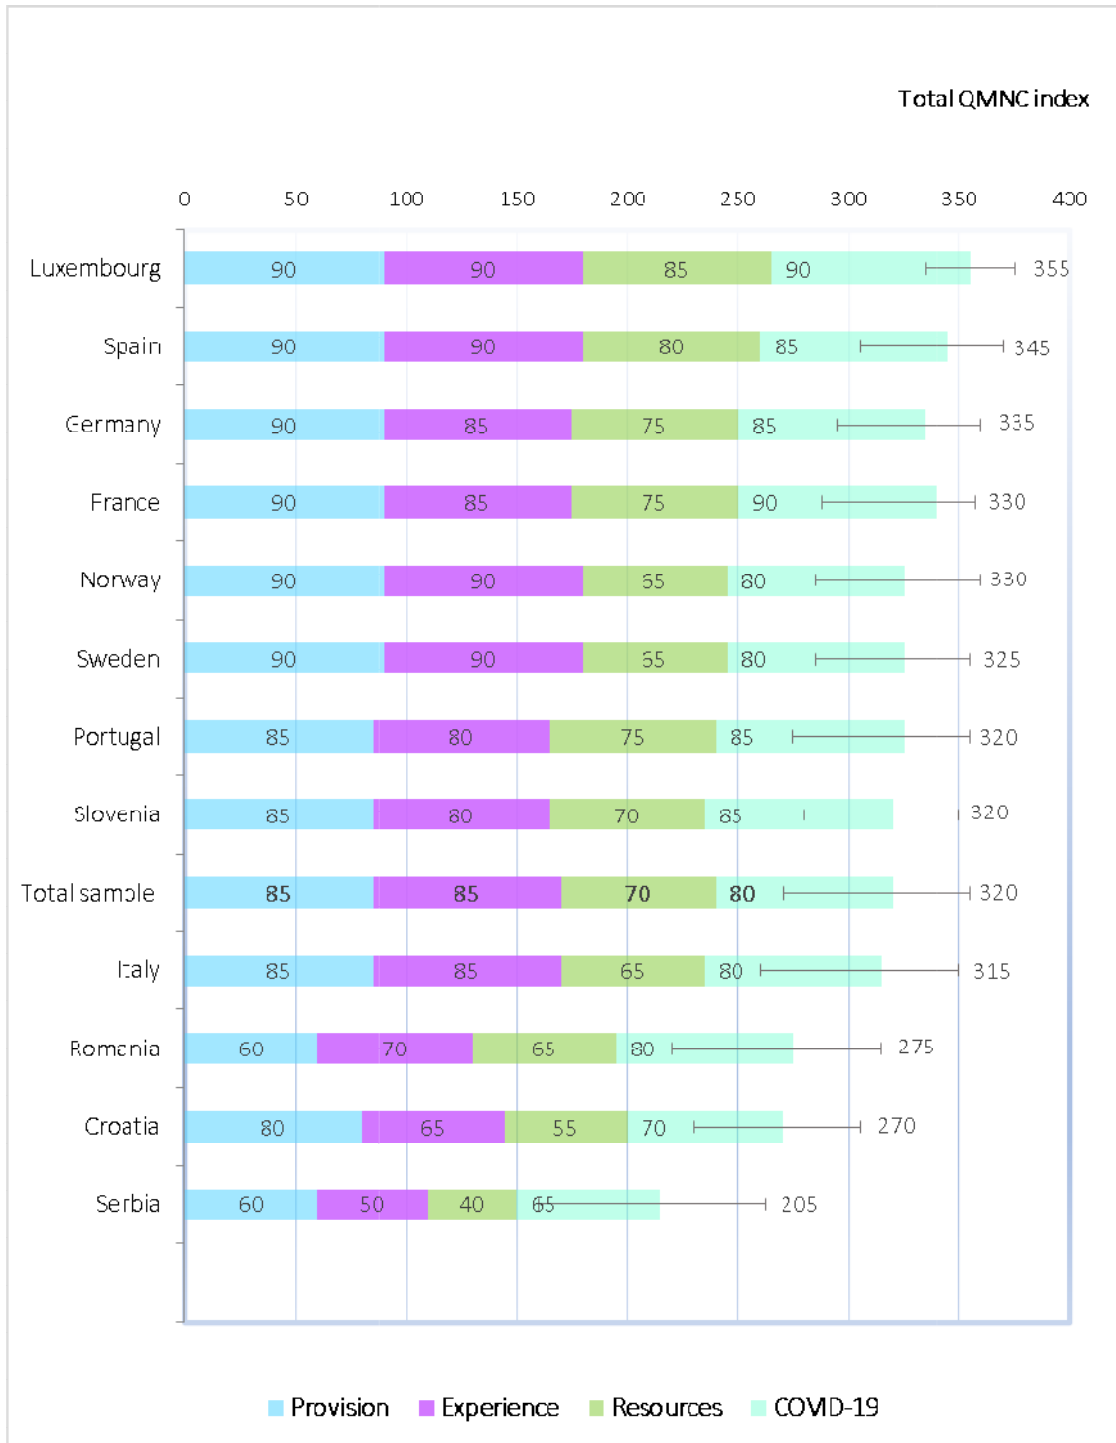

Note: the figure shows by country the median QMNC index values in each of the four domains (in the coloured bars), and the overall median value (in grey on the right of each bar) and interquartile ranges (error bars in grey) (N=21027).  
Abbreviation: QMNC = quality maternal and newborn care

Supplementary Figure 3 Sensitivity analysis #1: flow diagram (N=15399)

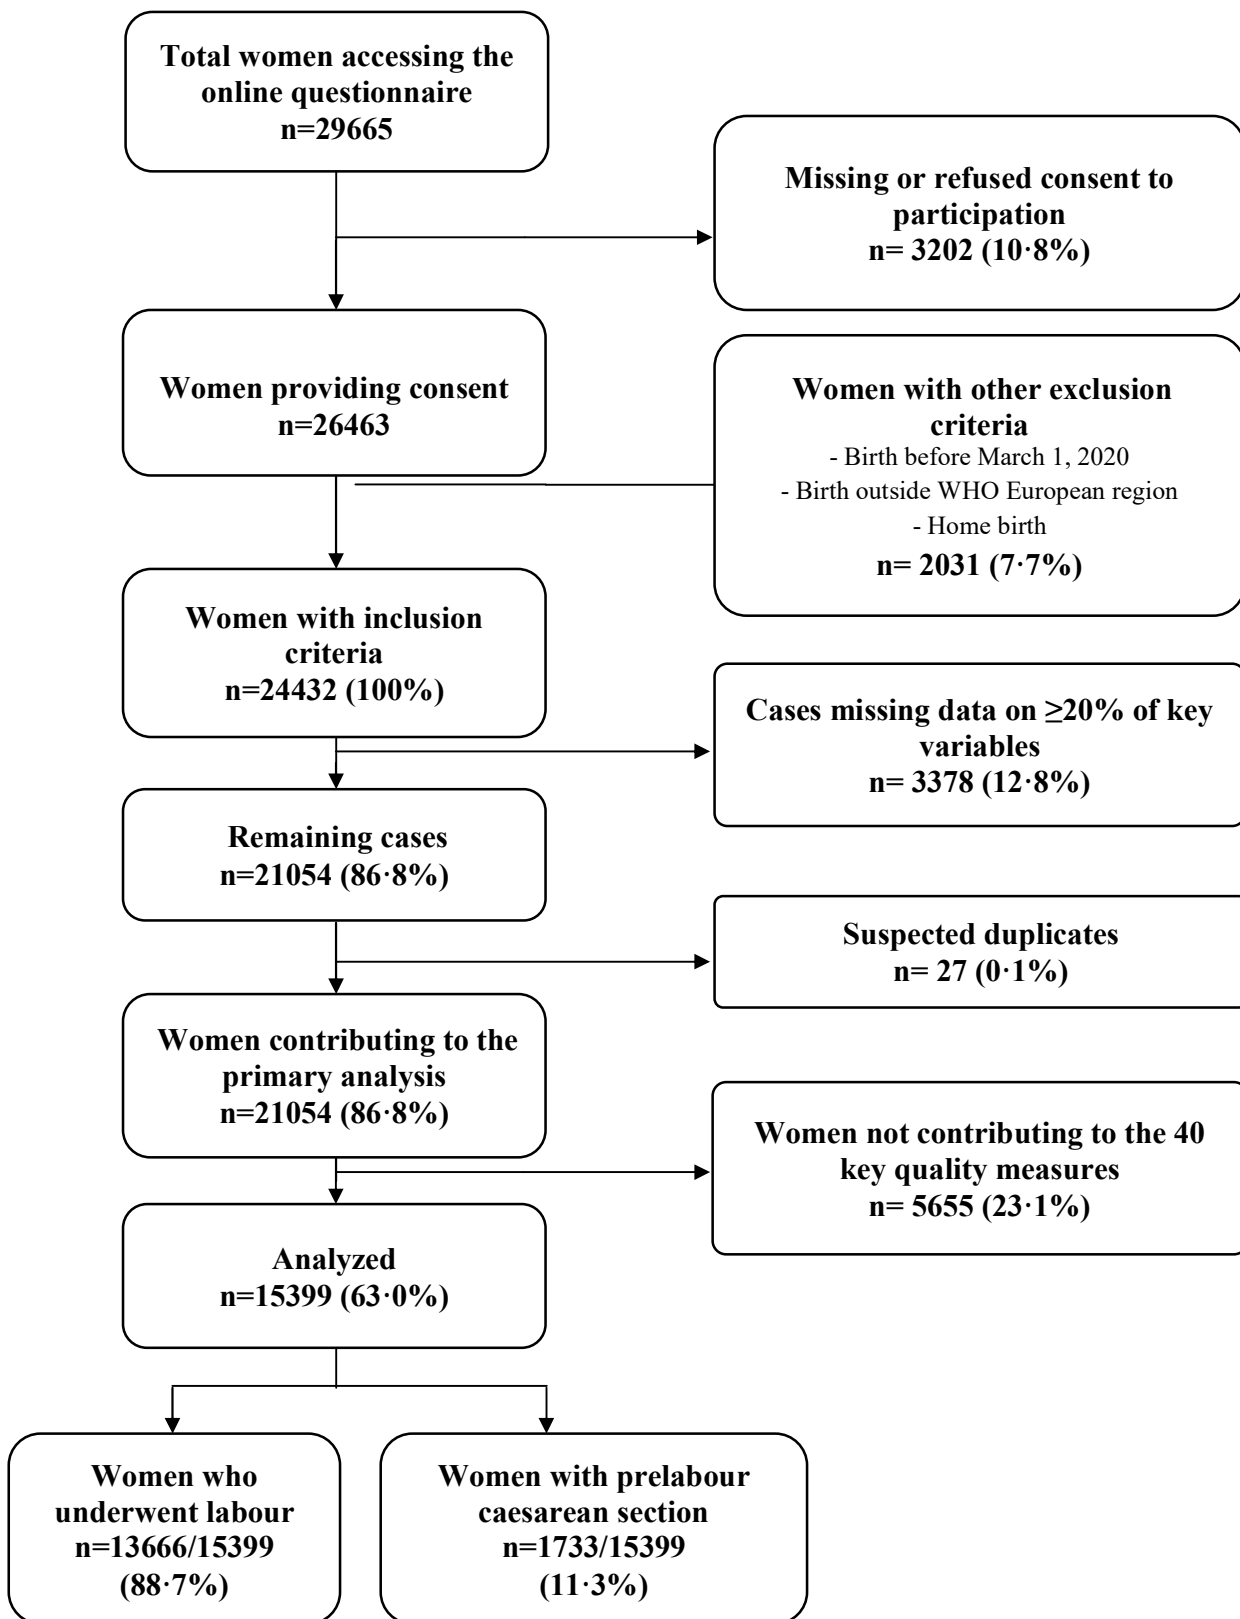

**Supplementary Table 12 Sensitivity analysis #1: characteristics of responders (N=15399)**

|                                                           | N=15399<br>n | %    |
|-----------------------------------------------------------|--------------|------|
| <b>Country</b>                                            |              |      |
| Sweden                                                    | 3779         | 24·5 |
| Italy                                                     | 3730         | 24·2 |
| Slovenia                                                  | 1711         | 11·1 |
| Norway                                                    | 1586         | 10·3 |
| Portugal                                                  | 1271         | 8·3  |
| Germany                                                   | 798          | 5·2  |
| Serbia                                                    | 468          | 3    |
| France                                                    | 405          | 2·6  |
| Romania                                                   | 406          | 2·6  |
| Luxembourg                                                | 351          | 2·3  |
| Croatia                                                   | 346          | 2·2  |
| Spain                                                     | 286          | 1·9  |
| Other <sup>1</sup>                                        | 262          | 1·7  |
| <b>Year of birth</b>                                      |              |      |
| 2020                                                      | 14054        | 91·3 |
| 2021                                                      | 908          | 5·9  |
| Missing                                                   | 437          | 2·8  |
| <b>Gave birth in the same country where you were born</b> |              |      |
| Yes                                                       | 13948        | 90·6 |
| No                                                        | 1127         | 7·3  |
| Missing                                                   | 324          | 2·1  |
| <b>Age range</b>                                          |              |      |
| 18-24                                                     | 687          | 4·5  |
| 25-30                                                     | 5360         | 34·8 |
| 31-35                                                     | 6074         | 39·4 |
| 36-39                                                     | 2263         | 14·7 |
| ≥40                                                       | 692          | 4·5  |
| Missing                                                   | 323          | 2·1  |
| <b>Educational level<sup>2</sup></b>                      |              |      |
| None                                                      | 6            | 0·1  |
| Elementary school                                         | 29           | 0·2  |
| Junior high school                                        | 841          | 5·5  |
| High secondary                                            | 3782         | 24·6 |
| University degree                                         | 6331         | 41·1 |
| Postgraduate degree / Master /Doctorate or higher         | 4087         | 26·5 |
| Missing                                                   | 323          | 2·1  |
| <b>Parity</b>                                             |              |      |
| 1                                                         | 9040         | 58·7 |

|                                                                                  |       |      |
|----------------------------------------------------------------------------------|-------|------|
| >1                                                                               | 6036  | 39·2 |
| Missing                                                                          | 323   | 2·1  |
| <b>Mode of birth</b>                                                             |       |      |
| Vaginal spontaneous                                                              | 11246 | 73·0 |
| Instrumental vaginal birth                                                       | 1323  | 8·6  |
| Caesarean section                                                                | 2830  | 18·3 |
| Elective caesarean section                                                       | 1157  | 7·5  |
| Emergency caesarean section during labour                                        | 1097  | 7·1  |
| Emergency caesarean section before going into labour                             | 576   | 3·7  |
| <b>Type of facility</b>                                                          |       |      |
| Public                                                                           | 14025 | 91·1 |
| Private                                                                          | 1050  | 6·8  |
| Missing                                                                          | 324   | 2·1  |
| <b>Type of healthcare providers who directly assisted the birth <sup>3</sup></b> |       |      |
| Midwife                                                                          | 13459 | 87·4 |
| Nurse                                                                            | 5624  | 36·5 |
| A student (i.e., before graduation)                                              | 2463  | 16·0 |
| Obstetrics registrar / medical resident (under post-graduation training)         | 2421  | 15·7 |
| Obstetrics and gynaecology doctor                                                | 7606  | 49·4 |
| I don't know (healthcare providers did not introduce themselves)                 | 1221  | 7·9  |
| Other                                                                            | 1999  | 13·0 |

Notes: <sup>1</sup> Other countries (sample): Belgium (101); Austria (29); UK (25); Bosnia Herzegovina (19); Finland (19) Switzerland (19); Denmark; Greece; Ireland; Netherlands; Ukraine; Andorra; Montenegro; Russian Federation; Lithuania; Iceland; Poland; Turkey; Hungary; Albania; Cyprus; Latvia; Macedonia; Czech Republic (for each country less than 10 cases); <sup>2</sup> Wording on education levels agreed among partners during the Delphi and questionnaire translated and back translated according to ISPOR Task Force for Translation and Cultural Adaptation Principles of Good Practice<sup>25</sup>; <sup>3</sup> More than one possible answer.

**Supplementary Table 13 Sensitivity analysis #1: results of the 40 key quality measures between women who underwent labour (N=1366) and women who did not (N=1733)**

**Women who underwent labour (N=1366)**

| Provision of care                              | Overall %<br>(95% CI) | Experience of care                           | Overall %<br>(95% CI) | Availability of physical and human resources  | Overall %<br>(95% CI) | Reorganizational changes due to COVID-19                       | Overall %<br>(95% CI) |
|------------------------------------------------|-----------------------|----------------------------------------------|-----------------------|-----------------------------------------------|-----------------------|----------------------------------------------------------------|-----------------------|
| 1. No pain relief during labour                | 23.7 (23.0; 24.4)     | 1. No freedom of movements during labour     | 28.8 (28.1; 29.6)     | 1. No timely care by HCPs at facility arrival | 12.1 (11.5; 12.6)     | 1. Difficulties in attending routine antenatal visits          | 41.1 (40.2; 41.9)     |
| 2. Mode of birth                               |                       | 2a. No choice of birth position (in SVB)     | 42.1 (41.2; 43.1)     | 2. No information on maternal danger signs    | 44.7 (43.9; 45.6)     | 2. Any barriers in accessing the facility                      | 31.1 (30.3; 31.9)     |
| 2a. IVB                                        | 9.7 (9.2; 10.2)       | 2b. No consent requested (for IVB)           | 54.0 (51.4; 56.7)     | 3. No information on newborn danger signs     | 54.9 (54.1; 55.7)     | 3. Inadequate info graphics                                    | 5.1 (4.7; 5.5)        |
| 2b. CS                                         | 8.0 (7.6; 8.5)        | 2c. No information on newborn (in ECS)       | 33.8 (31.0; 36.6)     | 4. Inadequate room comfort and equipment      | 7.8 (7.4; 8.3)        | 4. Inadequate wards reorganization                             | 36.8 (36.0; 37.6)     |
| 3a. Episiotomy (in SVB)                        | 19.5 (18.8; 20.3)     | 3. No clear/effective communication from HCP | 28.9 (28.2; 29.7)     | 5. Inadequate number of women per rooms       | 8.6 (8.1; 9.1)        | 5. Inadequate room reorganization                              | 37.8 (37.0; 38.7)     |
| 3b. Fundal pressure (in IVB)                   | 42.9 (40.3; 45.6)     | 4. No involvement in choices                 | 33.4 (32.6; 34.2)     | 6. Inadequate room cleaning                   | 6.1 (5.7; 6.5)        | 6. Lacking one functioning accessible hand-washing station     | 13.6 (13.0; 14.2)     |
| 3c. No pain relief after CS                    | 14.9 (12.8; 17.1)     | 5. Companionship not allowed                 | 61.2 (60.4; 62)       | 7. Inadequate bathroom                        | 12.8 (12.3; 13.4)     | 7. HCP not always using PPEs                                   | 32.6 (31.8; 33.4)     |
| 4. No skin to skin                             | 9.1 (8.6; 9.5)        | 6. Not treated with dignity                  | 22.1 (21.4; 22.8)     | 8. Inadequate partner visiting hours          | 61.2 (60.3; 62)       | 8. Insufficient HCP number                                     | 30.9 (30.1; 31.6)     |
| 5. No early breastfeeding                      | 13.6 (13.0; 14.2)     | 7. No emotional support                      | 25.9 (25.2; 26.6)     | 9. Inadequate HCP's number                    | 19.9 (19.3; 20.6)     | 9. Communication inadequate to contain COVID-19 related stress | 37.0 (36.2; 37.9)     |
| 6. Inadequate breastfeeding support            | 30.4 (29.7; 31.2)     | 8. No privacy                                | 17.5 (16.9; 18.2)     | 10. Inadequate HCP professionalism            | 5.1 (4.7; 5.5)        | 10. Reduction in QMNC due to COVID-19                          | 48.1 (47.2; 48.9)     |
| 7. No rooming-in                               | 14.2 (13.7; 14.8)     | 9. Abuses (physical /verbal /emotional)      | 11.7 (11.2; 12.3)     |                                               |                       |                                                                |                       |
| 8. Not allowed to stay with the baby as wished | 5.0 (4.7; 5.4)        | 10. Informal payment                         | 2.3 (2.1; 2.6)        |                                               |                       |                                                                |                       |
| 9. No exclusive breastfeeding at discharge     | 24.8 (24.1; 25.5)     |                                              |                       |                                               |                       |                                                                |                       |
| 10. No immediate attention when needed         | 30.4 (29.6; 31.1)     |                                              |                       |                                               |                       |                                                                |                       |

**Women with prelabour caesarean section (N=1733)**

| Provision of care                              | Overall %<br>(95% CI) | Experience of care                           | Overall %<br>(95% CI) | Availability of physical and human resources | Overall %<br>(95% CI) | Reorganizational changes due to COVID-19                       | Overall %<br>(95% CI) |
|------------------------------------------------|-----------------------|----------------------------------------------|-----------------------|----------------------------------------------|-----------------------|----------------------------------------------------------------|-----------------------|
| 1. Mode of birth                               |                       | 1. Consent requested for vaginal examination | 38.5 (36.2; 40.8)     | 1. No information on maternal danger signs   | 45.8 (43.5; 48.2)     | 1. Difficulties in attending routine antenatal visits          | 44.6 (42.3; 46.9)     |
| 1a. Elective CS                                | 66.8 (64.5; 69.0)     |                                              |                       |                                              |                       |                                                                |                       |
| 1b. ECS before labour                          | 33.2 (31.0; 35.5)     | 2. No information on newborn                 | 26.7 (24.6; 28.8)     | 2. No information on newborn danger signs    | 53.6 (51.3; 56)       | 2. Any barriers in accessing the facility                      | 34.3 (32; 36.5)       |
| 2. No pain relief after CS                     | 12.6 (11.0; 14.1)     | 3. No clear/effective communication from HCP | 35.2 (33.0; 37.4)     | 3. Inadequate room comfort and equipment     | 10.7 (9.2; 12.1)      | 3. Inadequate info graphics                                    | 7.3 (6.0; 8.5)        |
| 3. No skin to skin                             | 44.9 (42.6; 47.2)     | 4. No involvement in choices                 | 42.9 (40.6; 45.3)     | 4. Inadequate number of women per rooms      | 6.7 (5.5; 7.9)        | 4. Inadequate wards reorganization                             | 39.9 (37.6; 42.2)     |
| 4. No early breastfeeding                      | 47.5 (45.2; 49.9)     | 5. Companionship not allowed                 | 74.9 (72.9; 76.9)     | 5. Inadequate room cleaning                  | 8.7 (7.3; 10.0)       | 5. Inadequate room reorganization                              | 40.6 (38.3; 42.9)     |
| 5. Inadequate breastfeeding support            | 37.9 (35.6; 40.1)     | 6. Not treated with dignity                  | 31.3 (29.1; 33.5)     | 6. Inadequate bathroom                       | 14.1 (12.4; 15.7)     | 6. Lacking one functioning accessible hand-washing station     | 21.5 (19.5; 23.4)     |
| 6. No rooming-in                               | 30.6 (28.5; 32.8)     | 7. No emotional support                      | 32.1 (29.9; 34.3)     | 7. Inadequate partner visiting hours         | 68.5 (66.3; 70.7)     | 7. HCP not always using PPEs                                   | 23.5 (21.5; 25.5)     |
| 7. Not allowed to stay with the baby as wished | 11.0 (9.5; 12.4)      | 8. No privacy                                | 20.8 (18.9; 22.7)     | 8. Inadequate HCP's number                   | 21.5 (19.5; 23.4)     | 8. Insufficient HCP number                                     | 33.9 (31.7; 36.2)     |
| 8. No exclusive breastfeeding at discharge     | 45.4 (43.0; 47.7)     | 9. Abuses (physical /verbal/emotional)       | 14.6 (12.9; 16.3)     | 9. Inadequate HCP professionalism            | 7.3 (6.0; 8.5)        | 9. Communication inadequate to contain COVID-19 related stress | 42 (39.6; 44.3)       |
| 9. No immediate attention when needed          | 34.9 (32.7; 37.2)     | 10. Informal payment                         | 6.7 (5.5; 7.9)        | 10. Inadequate wards reorganization          | 39.9 (37.6; 42.2)     | 10. Reduction in QMNC due to COVID-19                          | 49.9 (47.5; 52.2)     |
| 10. No timely care by HCP at facility arrival  | 15.8 (14.1; 17.5)     |                                              |                       |                                              |                       |                                                                |                       |

**Notes**

All the indicators in the domains of provision of care, experience of care, and resources are directly based on WHO standards.

Indicators identified with letters (eg, 3a, 3b) were tailored to take into account different mode of birth (ie, spontaneous vaginal, instrumental vaginal, and caesarean section). These were calculated on subsamples (eg, 3a was calculated on spontaneous vaginal births; 3b was calculated on instrumental vaginal births).

Indicator 6 in the domains of reorganizational changes due to COVID-19 was defined as: at least one functioning and accessible hand-washing station (near or inside the room where the mother was hospitalised) supplied with water and soap or with disinfectant alcohol solution.

Abbreviations: CS = caesarean section; ECS = emergency caesarean section; HCP = health care provider; IVB = instrumental vaginal birth; PPE = personal protective equipment; QMNC = quality maternal and newborn care; SVB = spontaneous vaginal birth

Supplementary Figure 4. Sensitivity analysis #2: flow diagram (N=22130)

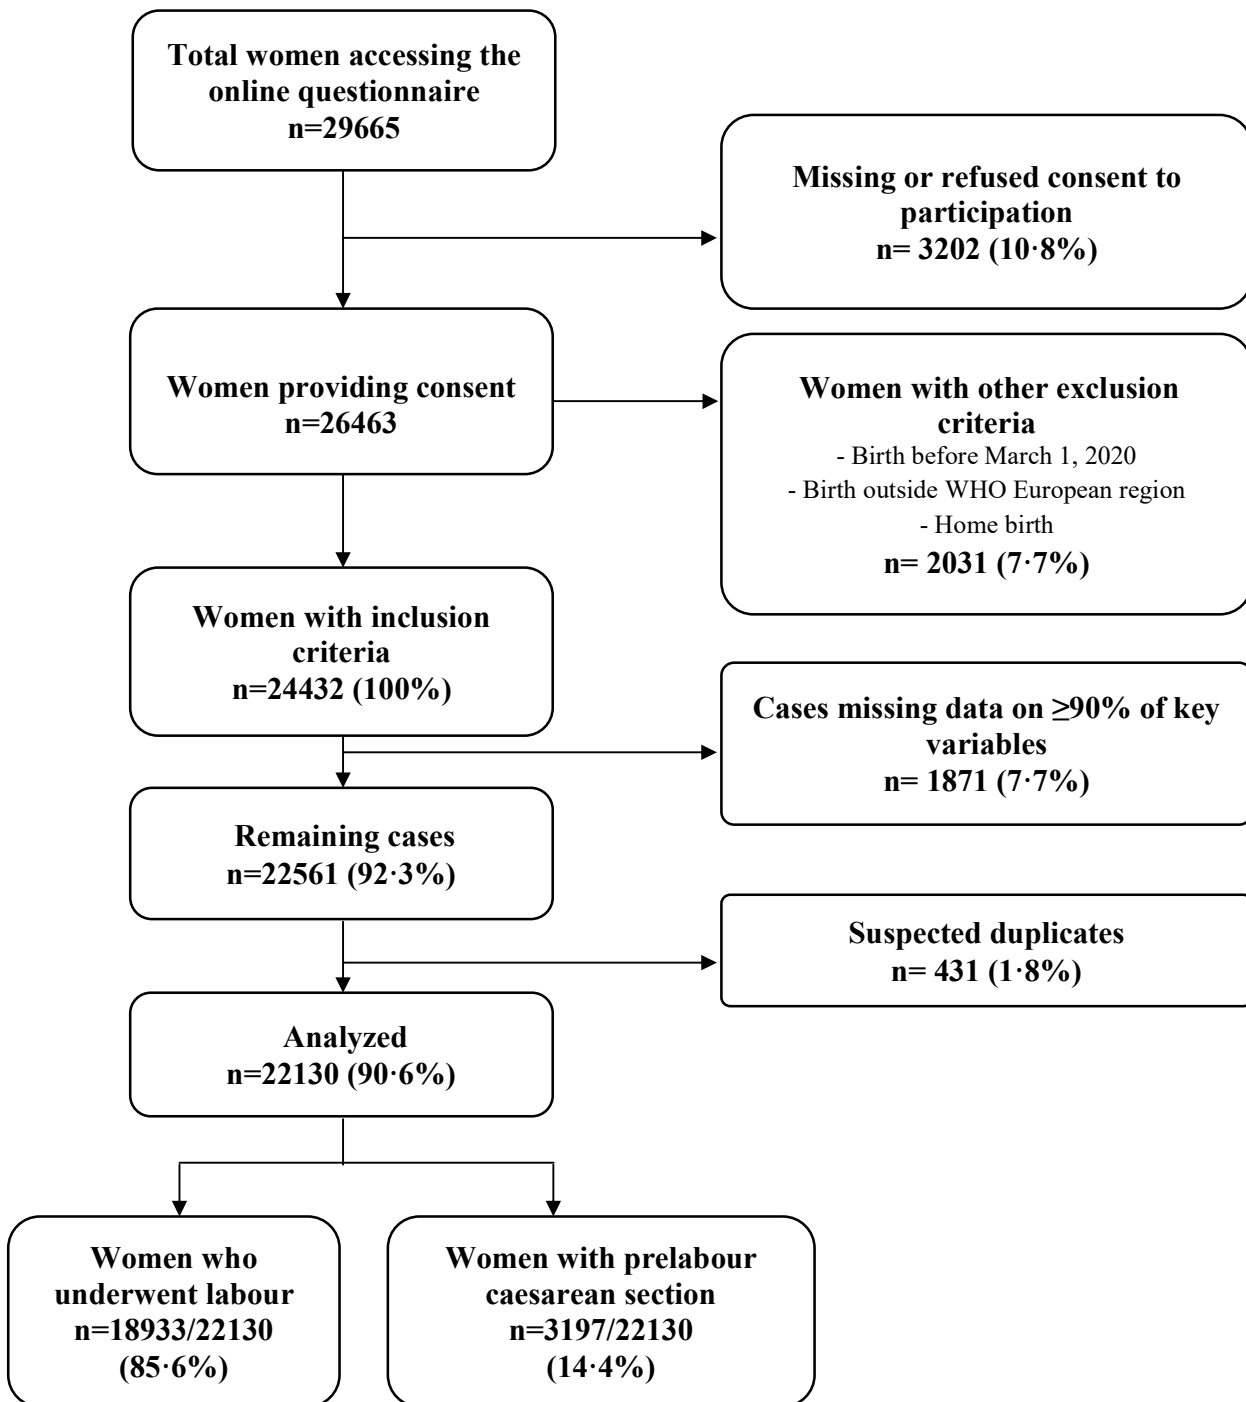

**Supplementary Table 14 Sensitivity analysis #2: characteristics of responders (N=22130)**

|                                                           | <b>N=22130</b> | <b>%</b> |
|-----------------------------------------------------------|----------------|----------|
|                                                           | <b>n</b>       |          |
| <b>Country</b>                                            |                |          |
| Italy                                                     | 5119           | 23·1     |
| Sweden                                                    | 4918           | 22·2     |
| Norway                                                    | 3367           | 15·2     |
| Slovenia                                                  | 2217           | 10·0     |
| Portugal                                                  | 1777           | 8·0      |
| Germany                                                   | 1147           | 5·2      |
| Serbia                                                    | 677            | 3·1      |
| Romania                                                   | 632            | 2·9      |
| France                                                    | 578            | 2·6      |
| Croatia                                                   | 486            | 2·2      |
| Luxembourg                                                | 467            | 2·1      |
| Spain                                                     | 371            | 1·7      |
| Other <sup>1</sup>                                        | 374            | 1·7      |
| <b>Year of birth</b>                                      |                |          |
| 2020                                                      | 11458          | 51·8     |
| 2021                                                      | 8752           | 39·5     |
| Missing                                                   | 1920           | 8·7      |
| <b>Gave birth in the same country where you were born</b> |                |          |
| Yes                                                       | 19021          | 86·0     |
| No                                                        | 1523           | 6·9      |
| Missing                                                   | 1586           | 7·2      |
| <b>Age range</b>                                          |                |          |
| 18-24                                                     | 949            | 4·3      |
| 25-30                                                     | 7323           | 33·1     |
| 31-35                                                     | 8213           | 37·1     |
| 36-39                                                     | 3070           | 13·9     |
| ≥40                                                       | 992            | 4·5      |
| Missing                                                   | 1583           | 7·2      |
| <b>Educational level <sup>2</sup></b>                     |                |          |
| None                                                      | 6              | 0·1      |
| Elementary school                                         | 46             | 0·2      |
| Junior high school                                        | 1100           | 5·0      |
| High secondary                                            | 5152           | 23·3     |
| University degree                                         | 8725           | 39·4     |
| Postgraduate degree / Master /Doctorate or higher         | 5515           | 24·9     |
| Missing                                                   | 1586           | 7·2      |
| <b>Parity</b>                                             |                |          |
| 1                                                         | 12554          | 56·7     |



|                                                                                  |       |      |
|----------------------------------------------------------------------------------|-------|------|
| >1                                                                               | 7992  | 36·1 |
| Missing                                                                          | 1584  | 7·2  |
| <b>Mode of birth</b>                                                             |       |      |
| Vaginal spontaneous                                                              | 14110 | 67·1 |
| Instrumental vaginal birth                                                       | 1928  | 9·2  |
| Caesarean section                                                                | 4989  | 23·7 |
| Elective caesarean section                                                       | 2155  | 9·7  |
| Emergency caesarean section during labour                                        | 2155  | 9·7  |
| Emergency caesarean section before going into labour                             | 1042  | 4·7  |
| <b>Type of facility</b>                                                          |       |      |
| Public                                                                           | 19160 | 86·6 |
| Private                                                                          | 1387  | 6·3  |
| Missing                                                                          | 1583  | 7·2  |
| <b>Type of healthcare providers who directly assisted the birth <sup>3</sup></b> |       |      |
| Midwife                                                                          | 18153 | 82·0 |
| Nurse                                                                            | 8068  | 36·5 |
| A student (i.e. before graduation)                                               | 3450  | 15·6 |
| Obstetrics registrar / medical resident (under post-graduation training)         | 3780  | 17·1 |
| Obstetrics and gynaecology doctor                                                | 10876 | 49·1 |
| I don't know (healthcare providers did not introduce themselves)                 | 1802  | 8·1  |
| Other                                                                            | 3029  | 13·7 |

Notes: <sup>1</sup> Other countries (sample): Belgium (129); Austria (42); UK (38); Bosnia Herzegovina (33); Finland (32); Switzerland (23); Denmark (17); Greece (10); Ireland; Netherlands; Ukraine; Andorra; Montenegro; Russian Federation; Lithuania; Iceland; Poland; Turkey; Hungary; Albania; Cyprus; Latvia; Macedonia; Czech Republic (for each country less than 10 cases); <sup>2</sup> Wording on education levels agreed among partners during the Delphi and questionnaire translated and back translated according to ISPOR Task Force for Translation and Cultural Adaptation Principles of Good Practice; <sup>3</sup> More than one possible answer.

**Supplementary Table 15 Sensitivity analysis #2: results of the 40 key quality measures between women who underwent labour (N=18933) and women who did not (N=3197)**

**Women who underwent labour (N=18933)**

| Provision of care                              | Overall %<br>(95% CI) | Experience of care                           | Overall %<br>(95% CI) | Availability of physical and human resources  | Overall %<br>(95% CI) | Reorganizational changes due to COVID-19                       | Overall %<br>(95% CI) |
|------------------------------------------------|-----------------------|----------------------------------------------|-----------------------|-----------------------------------------------|-----------------------|----------------------------------------------------------------|-----------------------|
| 1. No pain relief during labour                | 21.0 (20.4; 21.5)     | 1. No freedom of movements during labour     | 25.7 (25.1; 26.4)     | 1. No timely care by HCPs at facility arrival | 13.2 (12.7; 13.7)     | 1. Difficulties in attending routine antenatal visits          | 39.9 (39.2; 40.6)     |
| 2. Mode of birth                               |                       | 2a. No choice of birth position (in SVB)     | 42.8 (42.0; 43.6)     | 2. No information on maternal danger signs    | 45.3 (44.6; 46.0)     | 2. Any barriers in accessing the facility                      | 30.0 (29.3; 30.6)     |
| 2a. IVB                                        | 10.8 (10.3; 11.2)     | 2b. No consent requested (for IVB)           | 53.5 (51.3; 55.6)     | 3. No information on newborn danger signs     | 54.9 (54.2; 55.6)     | 3. Inadequate info graphics                                    | 5.4 (5.1; 5.7)        |
| 2b. CS                                         | 11.4 (10.9; 11.8)     | 2c. No information on newborn (in ECS)       | 37.5 (35.5; 39.5)     | 4. Inadequate room comfort and equipment      | 8.1 (7.7; 8.4)        | 4. Inadequate wards reorganization                             | 35.5 (34.8; 36.1)     |
| 3a. Episiotomy (in SVB)                        | 20.4 (19.8; 21.1)     | 3. No clear/effective communication from HCP | 29.9 (29.3; 30.6)     | 5. Inadequate number of women per rooms       | 8.5 (8.1; 8.9)        | 5. Inadequate room reorganization                              | 36.2 (35.5; 36.9)     |
| 3b. Fundal pressure (in IVB)                   | 41.5 (39.4; 43.7)     | 4. No involvement in choices                 | 34.1 (33.5; 34.8)     | 6. Inadequate room cleaning                   | 6.5 (6.1; 6.8)        | 6. Lacking one functioning accessible hand-washing station     | 13.0 (12.5; 13.4)     |
| 3c. No pain relief after CS                    | 15.1 (13.6; 16.6)     | 5. Companionship not allowed                 | 60.9 (60.2; 61.6)     | 7. Inadequate bathroom                        | 13 (12.5; 13.5)       | 7. HCP not always using PPEs                                   | 32.9 (32.2; 33.5)     |
| 4. No skin to skin                             | 9.3 (8.8; 9.7)        | 6. Not treated with dignity                  | 23.5 (22.9; 24.1)     | 8. Inadequate partner visiting hours          | 59.7 (59.0; 60.4)     | 8. Insufficient HCP number                                     | 30.3 (29.7; 31.0)     |
| 5. No early breastfeeding                      | 13.2 (12.7; 13.7)     | 7. No emotional support                      | 27.0 (26.3; 27.6)     | 9. Inadequate HCP's number                    | 20.4 (19.8; 20.9)     | 9. Communication inadequate to contain COVID-19 related stress | 36.4 (35.7; 37.1)     |
| 6. Inadequate breastfeeding support            | 31.3 (30.7; 32.0)     | 8. No privacy                                | 17.9 (17.4; 18.5)     | 10. Inadequate HCP professionalism            | 5.4 (5.1; 5.7)        | 10. Reduction in QMNC due to COVID-19                          | 47.6 (46.9; 48.3)     |
| 7. No rooming-in                               | 19.8 (19.2; 20.3)     | 9. Abuses (physical /verbal /emotional)      | 12.3 (11.8; 12.8)     |                                               |                       |                                                                |                       |
| 8. Not allowed to stay with the baby as wished | 7.2 (6.8; 7.6)        | 10. Informal payment                         | 2.4 (2.2; 2.7)        |                                               |                       |                                                                |                       |
| 9. No exclusive breastfeeding at discharge     | 28.1 (27.5; 28.7)     |                                              |                       |                                               |                       |                                                                |                       |
| 10. No immediate attention when needed         | 30.9 (30.2; 31.5)     |                                              |                       |                                               |                       |                                                                |                       |

### Women with prelabour caesarean section (N=3197)

| Provision of care                              | Overall %<br>(95% CI) | Experience of care                           | Overall %<br>(95% CI) | Availability of physical and human resources | Overall %<br>(95% CI) | Reorganizational changes due to COVID-19                       | Overall %<br>(95% CI) |
|------------------------------------------------|-----------------------|----------------------------------------------|-----------------------|----------------------------------------------|-----------------------|----------------------------------------------------------------|-----------------------|
| 1. Mode of birth<br>1a. Elective CS            | 67.4 (65.8; 69.0)     | 1. Consent requested for vaginal examination | 29.1 (27.5; 30.6)     | 1. No information on maternal danger signs   | 45.4 (43.7; 47.1)     | 1. Difficulties in attending routine antenatal visits          | 40.6 (38.9; 42.3)     |
| 1b. ECS before labour                          | 32.6 (31; 34.2)       | 2. No information on newborn                 | 29.3 (27.7; 30.9)     | 2. No information on newborn danger signs    | 52.5 (50.8; 54.2)     | 2. Any barriers in accessing the facility                      | 32.5 (30.9; 34.2)     |
| 2. No pain relief after CS                     | 13.2 (12.1; 14.4)     | 3. No clear/effective communication from HCP | 34.5 (32.9; 36.2)     | 3. Inadequate room comfort and equipment     | 10.2 (9.1; 11.2)      | 3. Inadequate info graphics                                    | 6.1 (5.3; 7.0)        |
| 3. No skin to skin                             | 35.0 (33.3; 36.6)     | 4. No involvement in choices                 | 42.1 (40.4; 43.8)     | 4. Inadequate number of women per rooms      | 6.7 (5.8; 7.6)        | 4. Inadequate wards reorganization                             | 37.9 (36.2; 39.6)     |
| 4. No early breastfeeding                      | 36.2 (34.5; 37.9)     | 5. Companionship not allowed                 | 69.8 (68.2; 71.4)     | 5. Inadequate room cleaning                  | 7.9 (6.9; 8.8)        | 5. Inadequate room reorganization                              | 36.9 (35.2; 38.6)     |
| 5. Inadequate breastfeeding support            | 37.7 (36.0; 39.3)     | 6. Not treated with dignity                  | 29.7 (28.2; 31.3)     | 6. Inadequate bathroom                       | 13.6 (12.4; 14.8)     | 6. Lacking one functioning accessible hand-washing station     | 17.7 (16.4; 19.0)     |
| 6. No rooming-in                               | 36.6 (35.0; 38.3)     | 7. No emotional support                      | 30.7 (29.1; 32.3)     | 7. Inadequate partner visiting hours         | 63.8 (62.1; 65.4)     | 7. HCP not always using PPEs                                   | 26.1 (24.6; 27.6)     |
| 7. Not allowed to stay with the baby as wished | 14.4 (13.1; 15.6)     | 8. No privacy                                | 20 (18.6; 21.4)       | 8. Inadequate HCP's number                   | 20.4 (19; 21.8)       | 8. Insufficient HCP number                                     | 31.9 (30.3; 33.5)     |
| 8. No exclusive breastfeeding at discharge     | 47.5 (45.8; 49.3)     | 9. Abuses (physical /verbal/emotional)       | 13.7 (12.5; 14.9)     | 9. Inadequate HCP professionalism            | 6.1 (5.3; 7.0)        | 9. Communication inadequate to contain COVID-19 related stress | 39.5 (37.8; 41.2)     |
| 9. No immediate attention when needed          | 34.9 (33.3; 36.6)     | 10. Informal payment                         | 5.2 (4.4; 5.9)        | 10. Inadequate wards reorganization          | 37.9 (36.2; 39.6)     | 10. Reduction in QMNC due to COVID-19                          | 46.5 (44.8; 48.3)     |
| 10. No timely care by HCP at facility arrival  | 14.7 (13.5; 15.9)     |                                              |                       |                                              |                       |                                                                |                       |

#### Notes

All the indicators in the domains of provision of care, experience of care, and resources are directly based on WHO standards.

Indicators identified with letters (eg, 3a, 3b) were tailored to take into account different mode of birth (ie, spontaneous vaginal, instrumental vaginal, and caesarean section). These were calculated on subsamples (eg, 3a was calculated on spontaneous vaginal births; 3b was calculated on instrumental vaginal births).

Indicator 6 in the domains of reorganizational changes due to COVID-19 was defined as: at least one functioning and accessible hand-washing station (near or inside the room where the mother was hospitalised) supplied with water and soap or with disinfectant alcohol solution.

Abbreviations: CS = caesarean section; ECS = emergency caesarean section; HCP = health care provider; IVB = instrumental vaginal birth; PPE = personal protective equipment; QMNC = quality maternal and newborn care; SVB = spontaneous vaginal birth

**Supplementary Table 16 Multivariable quantile regression estimates (n=14954)**

|                                                         | <b>0·25th centile</b>      |                | <b>0·50th centile (median)</b> |                | <b>0·75th centile</b>      |                |
|---------------------------------------------------------|----------------------------|----------------|--------------------------------|----------------|----------------------------|----------------|
|                                                         | <b>Coefficient (95%CI)</b> | <b>p value</b> | <b>Coefficient (95%CI)</b>     | <b>p value</b> | <b>Coefficient (95%CI)</b> | <b>p value</b> |
| <b>Parity</b>                                           |                            |                |                                |                |                            |                |
| 1                                                       | Ref                        |                | Ref                            |                | Ref                        |                |
| >1                                                      | 20·0 (17·3; 22·7)          | <0·001         | 13·2 (11·0; 15·4)              | <0·001         | 10·0 (8·5; 11·5)           | <0·001         |
| <b>Mother and newborn's country of birth</b>            |                            |                |                                |                |                            |                |
| Same country                                            | Ref                        |                | Ref                            |                | Ref                        |                |
| Different country                                       | -1·7 (-7·9; 4·6)           | 0·601          | 2·7 (-0·9; 5·5)                | 0·057          | 0·0 (-2·4; 2·4)            | 1·0            |
| <b>Type of facility</b>                                 |                            |                |                                |                |                            |                |
| Public                                                  | Ref                        |                | Ref                            |                | Ref                        |                |
| Private                                                 | 28·3 (23·6; 33·0)          | <0·001         | 28·6 (24·5; 32·7)              | <0·001         | 20·0 (18·0; 22·0)          | <0·001         |
| <b>Age range</b>                                        |                            |                |                                |                |                            |                |
| 18-24                                                   | -11·7 (-17·0; -6·4)        | <0·001         | -10·9 (-17·0; -4·8)            | <0·001         | -5·0 (-9·5; -0·5)          | 0·030          |
| 25-30                                                   | 0·0 (-3·1; 3·1)            | 1·0            | -0·5 (-3·0; 2·1)               | 0·727          | 0·0 (-1·6; 1·6)            | 1·0            |
| 31-35                                                   | Ref                        |                | Ref                            |                | Ref                        |                |
| 36-40                                                   | 3·3 (-0·2; 6·9)            | 0·065          | 0·5 (-2·2; 3·1)                | 0·733          | 0·0 (-2·0; 2·0)            | 1·0            |
| >40                                                     | 5·0 (-0·1; 9·9)            | 0·055          | 1·8 (-2·7; 6·3)                | 0·426          | 5·0 (-0·6; 10·6)           | 0·081          |
| <b>Educational level</b>                                |                            |                |                                |                |                            |                |
| None or elementary                                      | -8·3 (-45·9; 29·2)         | 0·663          | 1·8 (-44·0; 47·6)              | 0·938          | -5·0 (-14·1; 4·1)          | 0·284          |
| Junior high school                                      | 5·0 (-0·5; 10·5)           | 0·075          | 7·3 (3·7; 10·8)                | <0·001         | 5·0 (2·2; 7·8)             | 0·001          |
| High school                                             | 0·0 (-3·3; 3·3)            | 1·0            | 1·8 (-0·7; 4·3)                | 0·150          | 0·0 (-1·5; 1·5)            | 1·0            |
| University or higher                                    | Ref                        |                | Ref                            |                | Ref                        |                |
| <b>Year of birth</b>                                    |                            |                |                                |                |                            |                |
| 2020                                                    | Ref                        |                | Ref                            |                | Ref                        |                |
| 2021                                                    | 21·7 (18·6; 24·8)          | <0·001         | 16·8 (14·1; 19·5)              | <0·001         | 10·0 (7·2; 12·8)           | <0·001         |
| <b>Mode of birth</b>                                    |                            |                |                                |                |                            |                |
| Spontaneous VB                                          | Ref                        |                | Ref                            |                | Ref                        |                |
| Instrumental VB                                         | -23·3 (-28·3; -18·4)       | <0·001         | -20·5 (-24·9; -16·0)           | <0·001         | -15·0 (-17·6; -12·4)       | <0·001         |
| CS                                                      | -28·3 (-32·6; -24·1)       | <0·001         | -21·8 (-25·3; -18·3)           | <0·001         | -15·0 (-17·4; -12·6)       | <0·001         |
| <b>Midwife in the team who assisted the birth</b>       |                            |                |                                |                |                            |                |
| No                                                      | Ref                        |                | Ref                            |                | Ref                        |                |
| Yes                                                     | 31·7 (25·7; 37·7)          | <0·001         | 24·5 (19·9; 29·2)              | <0·001         | 15·0 (11·0; 19·0)          | <0·001         |
| <b>OB-GYN doctor in the team who assisted the birth</b> |                            |                |                                |                |                            |                |
| No                                                      | Ref                        |                | Ref                            |                | Ref                        |                |
| Yes                                                     | 10·0 (7·1; 12·9)           | <0·001         | 6·4 (3·9; 8·8)                 | <0·001         | 0·0 (-1·7; 1·7)            | 1·0            |
| <b>Country</b>                                          |                            |                |                                |                |                            |                |
| Croatia                                                 | -35·0 (-45·8; -24·2)       | <0·001         | -43·2 (-49·6; -36·8)           | <0·001         | -40·0 (-48·6; -31·4)       | <0·001         |
| France                                                  | 13·3 (5·0; 21·6)           | 0·002          | 9·1 (3·6; 14·6)                | 0·001          | 5·0 (-1·5; 11·5)           | 0·131          |
| Germany                                                 | 25·0 (18·9; 31·1)          | <0·001         | 13·2 (8·9; 17·5)               | <0·001         | 5·0 (2·6; 7·4)             | <0·001         |
| Italy                                                   | Ref                        |                | Ref                            |                | Ref                        |                |
| Luxembourg                                              | 55·0 (47·2; 62·8)          | <0·001         | 35·5 (31·5; 39·4)              | <0·001         | 20·0 (17·3; 22·7)          | <0·001         |
| Norway                                                  | 20·0 (14·9; 25·1)          | <0·001         | 11·8 (7·1; 16·5)               | <0·001         | 5·0 (1·7; 8·3)             | 0·003          |
| Portugal                                                | 26·7 (21·3; 32·0)          | <0·001         | 19·1 (14·4; 23·8)              | <0·001         | 10·0 (7·3; 12·7)           | <0·001         |
| Romania                                                 | -28·3 (-37·0; -19·7)       | <0·001         | -29·5 (-40·3; -18·8)           | <0·001         | -25·0 (-31·2; -18·8)       | <0·001         |
| Serbia                                                  | -100 (-110·6; -89·4)       | <0·001         | -105 (-113·7; -96·3)           | <0·001         | -90·0 (-101·3; -78·7)      | <0·001         |
| Slovenia                                                | 10·0 (4·7; 15·3)           | <0·001         | 2·3 (-2·2; 6·7)                | 0·318          | -5·0 (-8·0; -2·0)          | 0·001          |
| Spain                                                   | 36·7 (31·3; 42·0)          | <0·001         | 23·2 (16·9; 29·4)              | <0·001         | 15·0 (7·6; 22·4)           | <0·001         |
| Sweden                                                  | 15·0 (10·6; 19·4)          | <0·001         | 7·3 (3·4; 11·1)                | <0·001         | 0·0 (-2·3; 2·3)            | 1·0            |
| Other countries                                         | 30·0 (21·5; 38·5)          | <0·001         | 26·8 (19·0; 34·7)              | <0·001         | 20·0 (16·9; 23·1)          | <0·001         |
| Intercept                                               | 228·3 (221·0; 235·7)       | <0·001         | 285·5 (279·6; 291·4)           | <0·001         | 335·0 (330·4; 229·6)       | <0·001         |

Notes: 95% CI and p value are calculated using robust estimation of standard errors.

Abbreviations: CI = confidence interval; CS = caesarean section; OB-GYN = obstetrics and gynaecology; VB = vaginal birth.
